# Supplementary material for: Covalency versus magnetic axiality in Nd molecular magnets: Nd-photoluminescence, strong ligand-field, and unprecedented nephelauxetic effect in fullerenes NdM2N@C80 (M = Sc, Lu, Y)
Source: Chem Sci. 2023 Dec 21;15(6):2141–57. doi: 10.1039/d3sc05146c (PMC10848757; doi:10.1039/d3sc05146c)
Supplement: SC-015-D3SC05146C-s001 [file SC-015-D3SC05146C-s001.pdf]

**Covalency *versus* magnetic axiality in Nd molecular magnets: Nd-photoluminescence, strong ligand-field, and unprecedented nephelauxetic effect in fullerenes NdM<sub>2</sub>N@C<sub>80</sub> (M = Sc, Lu, Y)**

Wei Yang,<sup>a</sup> Marco Rosenkranz,<sup>a</sup> Georgios Velkos,<sup>a</sup> Frank Ziegs,<sup>a</sup> Vasili Dubrovin,<sup>a</sup> Sandra Schiemenz,<sup>a</sup> Lukas Spree,<sup>a,b</sup> Matheus Felipe de Souza Barbosa,<sup>a</sup> Charles Guillemard,<sup>c</sup> Manuel Valvidares,<sup>c</sup> Bernd Büchner,<sup>a</sup> Fupin Liu,<sup>\*a</sup> Stanislav M. Avdoshenko,<sup>\*a</sup> Alexey A. Popov<sup>\*a</sup>

**Supporting Information**

|                                                                                                                               |     |
|-------------------------------------------------------------------------------------------------------------------------------|-----|
| Experimental details                                                                                                          | S2  |
| Synthesis                                                                                                                     | S4  |
| Spectroscopic properties                                                                                                      | S7  |
| Single-crystal XRD analysis                                                                                                   | S9  |
| DFT calculations                                                                                                              | S11 |
| Photoluminescence decay                                                                                                       | S14 |
| Photoluminescence spectra                                                                                                     | S15 |
| Photoluminescence -derived LF splitting                                                                                       | S21 |
| CASSCF and point charge calculations of NdSc <sub>2</sub> N@C <sub>80</sub>                                                   | S22 |
| CASSCF calculations of Nd(C <sub>5</sub> Me <sub>5</sub> ) <sub>3</sub> and Nd(C <sub>5</sub> Me <sub>4</sub> H) <sub>3</sub> | S27 |
| CASSCF calculations of NdLu <sub>2</sub> N@C <sub>80</sub> and NdY <sub>2</sub> N@C <sub>80</sub>                             | S28 |
| Spectroscopic nephelauxetic parameters in Nd-compound                                                                         | S31 |
| XMCD measurements                                                                                                             | S32 |
| Magnetization relaxation times                                                                                                | S34 |
| References                                                                                                                    | S36 |

## Experimental details

**HPLC:** HPLC analysis and separation were performed for toluene solutions of fullerene and with toluene as an eluent, employing semipreparative COSMOSIL Buckyrep and Buckyrep-D chromatographic columns (Nacalai Tesque) and Agilent 1260 Infinity II LC System. Recycling HPLC separation was performed using Sunflow 100 system (SunChrome).

**Mass spectrometry:** Laser desorption/ionization time-of-flight (LDI-TOF) mass-spectra were measured with a Bruker autoflex mass-spectrometer.

**UV-Vis spectrometry:** UV-vis-NIR absorption spectra were measured in toluene solution at room temperature with Shimadzu 3100 spectrophotometer.

**Vibrational spectroscopy.** Raman measurements were performed with T64000 spectrometer (Horiba). The sample was drop-casted from toluene solution onto KBr substrate and cooled down to 78 K. The spectra were measured with laser excitations at 532 nm and 660 nm (Torus lasers by Laser Quantum). For the measurement with 785 nm excitation (BrixX diode laser by Omicron Laserage), the sample was drop-casted on gold SERS substrate (Metrohm DropSens DRP-C220BT).

**X-ray diffraction.** Single crystal X-ray diffraction data collection was carried out at 100 K at the BESSY storage ring (BL14.2, Berlin-Adlershof, Germany).<sup>1</sup> XDSAPP2.0 suite was employed for data processing.<sup>2, 3</sup> The structure was solved by direct methods and refined by SHELXL-2018.<sup>4</sup> Hydrogen atoms were added geometrically and refined with a riding model.

**DFT computations.** DFT optimization of NdM<sub>2</sub>N@C<sub>80</sub> molecules was performed at the PBE/PAW level using the VASP code and recommended pseudopotentials with f-shell in-core treatment.<sup>5-9</sup>

**CASSCF calculations.** *Ab initio* energies and wave functions of Nd<sup>3+</sup> LF multiplets in NdM<sub>2</sub>N@C<sub>80</sub> molecules have been calculated at the CASSCF/SO-RASSI level of theory using the quantum chemistry package OpenMOLCAS<sup>10</sup> and SINGLE\_ANISO module.<sup>11</sup> The basis sets were ANO-RCC-VTZP or Nd and ANO-RCC-VDZP for other elements. Molecular structures used in CASSCF calculation were optimized with DFT.

**Magnetic measurements.** DC and AC magnetic measurements of powder samples were performed using a Quantum Design VSM MPMS3 magnetometer. Magnetic simulations were performed using PHI code.<sup>12</sup>

**XMCD measurements.** X-ray absorption measurements with circular polarized light were performed at beamline BOREAS<sup>13</sup> (synchrotron ALBA, Spain) using the total electron yield detection mode. Magnetic field was always oriented parallel to the X-ray beam. The sample was drop-casted onto HOPG substrate, which was glued to the sample-holder with a silver paste. To consider the variation of the X-ray beam intensity, the current from the sample was referred to the current from the gold grid. The measured spectrum was normalized to the intensity of the pre-edge signal, and then the broad background was subtracted. As a result of this procedure, the XAS signal intensity reported in the paper corresponds to the normalized increase of the XAS due to the specific absorption at the Nd-*M*<sub>4,5</sub> edge over the background signal. Non-polarized XAS intensity is defined as  $XAS = (\sigma^+ + \sigma^-)$ , XMCD intensity is  $(\sigma^- - \sigma^+)$ . When XMCD intensity is plotted in %, the XMCD signal is divided by the XAS intensity at its maximum. In the measurement of magnetization curves,  $\sigma^+$  or  $\sigma^-$  intensity during magnetic field sweep was measured at fixed energies corresponding to the maximum of XMCD signal.

**Photoluminescence spectroscopy.** CW NIR-PL spectra were measured with home-made microscope using excitation at 488 nm from Omicron PhoxX diode laser and detected with Andor iDus 1.7  $\mu$ m InGaAs camera attached to Kymera 328i spectrograph (Andor); temperature was controlled with Janis ST-500 microscopy cryostat. Good signal-to-noise ratio in PL spectra was obtained for acquisition times of 2–3 minutes. The

spectra did not show any changes during repeated measurements, indicating high photo-stability of the fullerene samples.

The PL decay measurements were performed with TCSPC technique based on ID900 Time Controller (ID Quantique). The 488 nm Omicron PhoxX diode laser was digitally modulated with the pulse width of 1 ns, and the ID230 NIR single-photon counter (ID Quantique) was used for broad-band time-resolved detection in the NIR range.

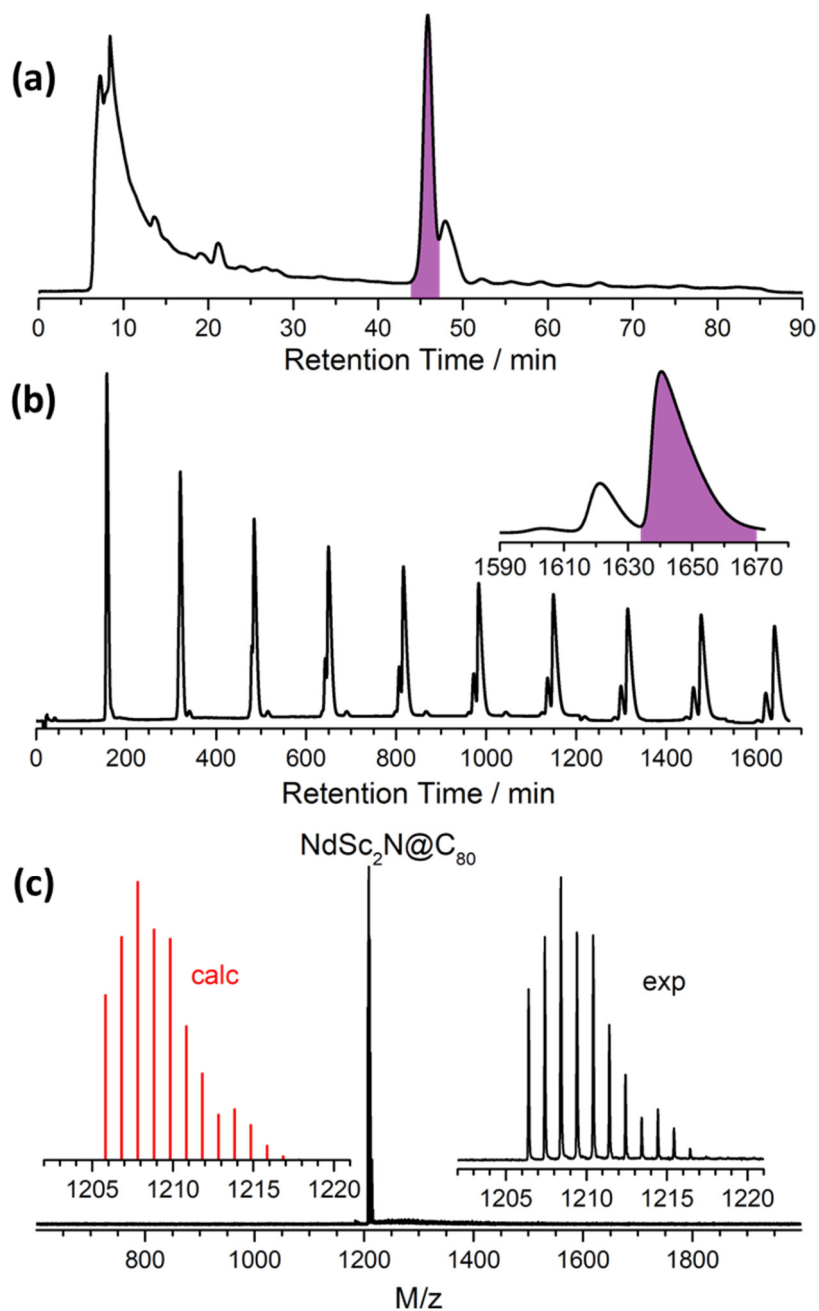

**Figure S1.** (a) HPLC chromatogram of crude  $\text{CS}_2$  fullerene extract from Nd-Sc nitride clusterfullerene synthesis,  $\text{NdSc}_2\text{N@C}_{80}$  is found in the highlighted fraction (2×Buckyprep columns, 5 mL/min). (b) Recycling HPLC chromatogram of the highlighted fraction collected in the first step, the inset shows the 10th cycle, the peak of  $\text{NdSc}_2\text{N@C}_{80}$  is highlighted in purple (Buckyprep column, 1 mL/min). (c) Positive-ion LDI mass spectrum of isolated  $\text{NdSc}_2\text{N@C}_{80}$ ; the insets show theoretical and experimental isotope distributions

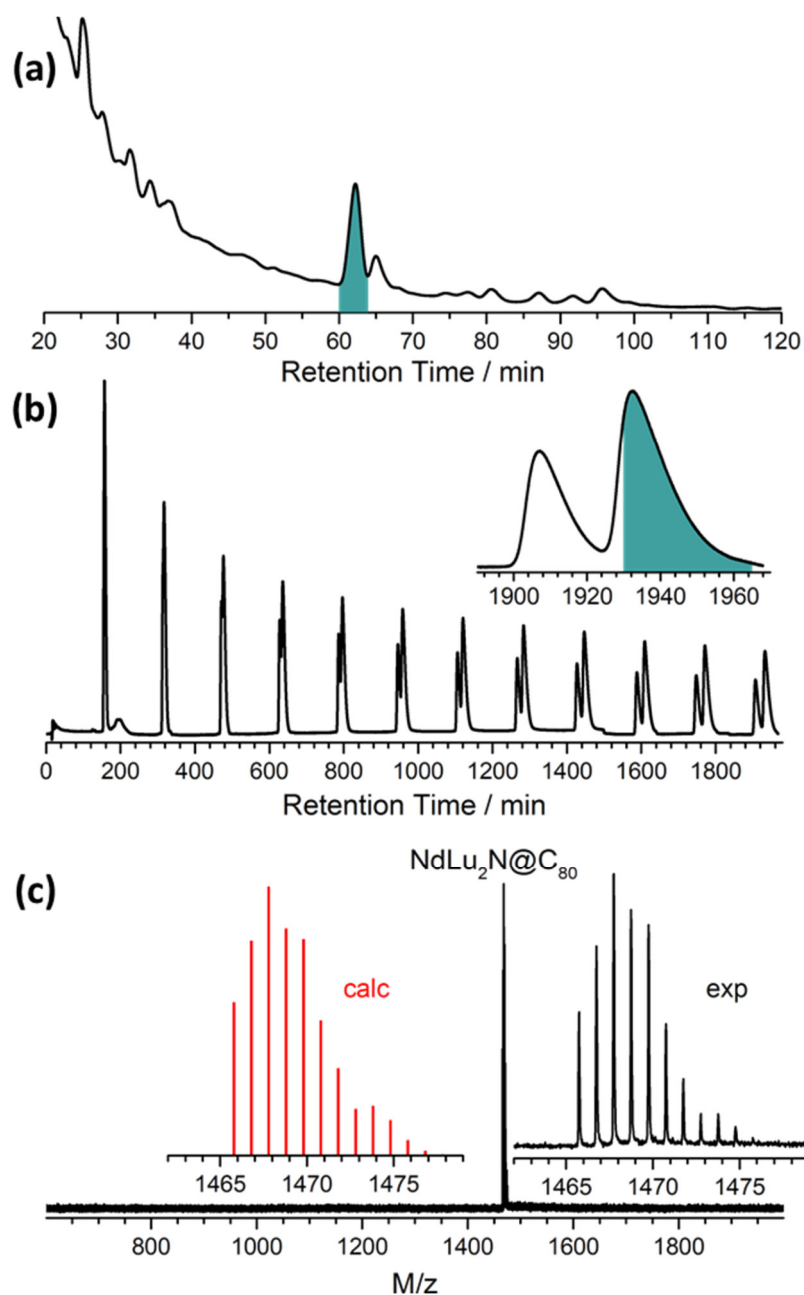

**Figure S2.** (a) HPLC chromatogram of crude CS<sub>2</sub> fullerene extract from Nd-Lu nitride clusterfullerene synthesis, NdLu<sub>2</sub>N@C<sub>80</sub> is found in the highlighted fraction (2×Buckyprep columns, 4 mL/min). (b) Recycling HPLC chromatogram of the highlighted fraction collected in the first step, the inset shows the 12th cycle, the peak of NdLu<sub>2</sub>N@C<sub>80</sub> is highlighted in dark cyan (Buckyprep column, 1 mL/min). (c) Positive-ion LDI mass spectrum of isolated NdLu<sub>2</sub>N@C<sub>80</sub>; the insets show theoretical and experimental isotope distributions

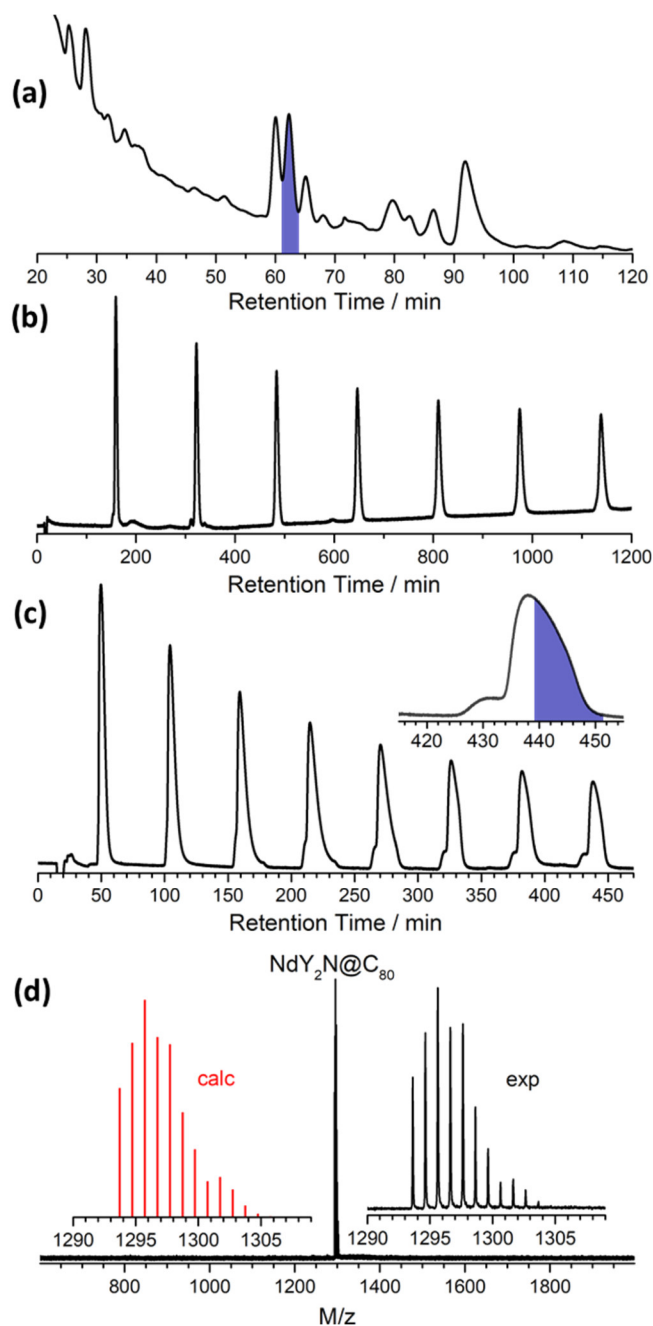

**Figure S3.** (a) HPLC chromatogram of crude  $\text{CS}_2$  fullerene extract from Nd-Y nitride clusterfullerene synthesis,  $\text{NdY}_2\text{N}@C_{80}$  is found in the highlighted fraction (2×Buckyprep columns, 4 mL/min). (b) Recycling HPLC chromatogram (Buckyprep column, 1 mL/min) of the highlighted fraction collected in the first step, only small traces of  $\text{Y}_3\text{N}@C_{86}$  could be removed with this column, while the main fraction is a mixture of  $\text{NdY}_2\text{N}@C_{80}$  and  $\text{Y}_3\text{N}@C_{80}$ . (c) Recycling HPLC chromatogram with Buckyprep-D column (1 mL/min), the inset shows 8th cycle, the part of peak with pure  $\text{NdY}_2\text{N}@C_{80}$  is highlighted in blue. (d) Positive-ion LDI mass spectrum of isolated  $\text{NdY}_2\text{N}@C_{80}$ ; the insets show theoretical and experimental isotope distributions.

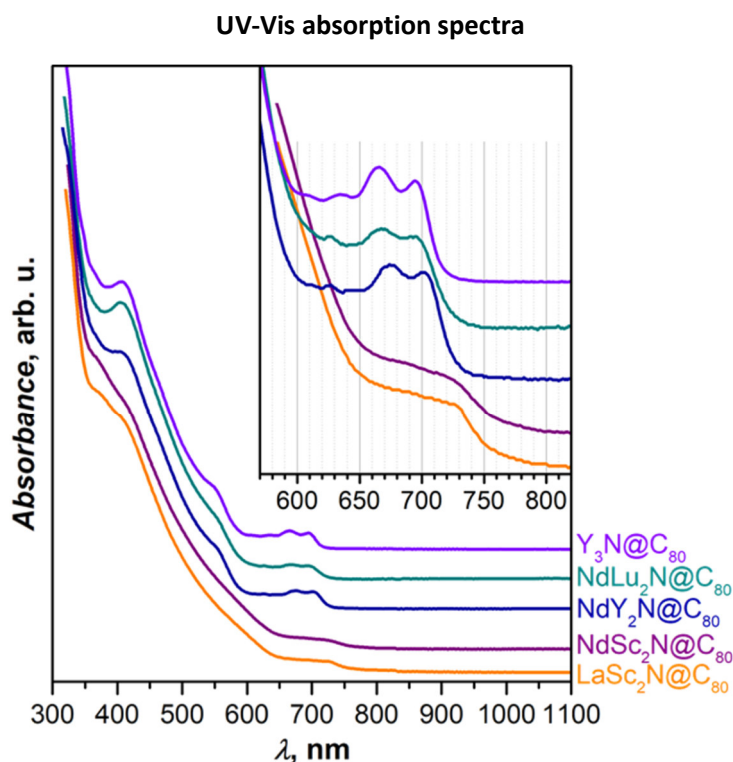

**Figure S4.** UV-Vis absorption spectra (room temperature, toluene solution) of isolated  $NdM_2N@C_{80}$  ( $M = Sc, Lu, Y$ ) compared to the spectra of  $LaSc_2N@I_h-C_{80}$  and  $Y_3N@I_h-C_{80}$ . The inset shows magnification of the low-energy part of the spectra.

When  $M_3N@I_h-C_{80}$  contains no Sc, the low-energy part of the absorption spectrum has several well-defined absorption features, with the lowest one near 700 nm.  $Y_3N@I_h-C_{80}$  can serve as a typical example, and the spectra of  $NdLu_2N@C_{80}$  and  $NdY_2N@C_{80}$  are very similar to that. The energy is only slightly affected by the size of the endohedral cluster (observe  $\approx 5$  nm shift between  $NdY_2N@C_{80}$  and  $Y_3N@C_{80}$ ). When Sc is present in the cluster, the bands usually become broader, and the lowest-energy absorption shows a red shift to 740 nm. Here  $LaSc_2N@C_{80}$  is a typical example, to which the spectrum of  $NdSc_2N@C_{80}$  appears very similar. None of  $NdM_2N@C_{80}$  fullerenes shows additional absorption features which might be ascribed to f-f transitions of  $Nd^{3+}$ .

Vibrational spectra of NdSc<sub>2</sub>N@C<sub>80</sub>

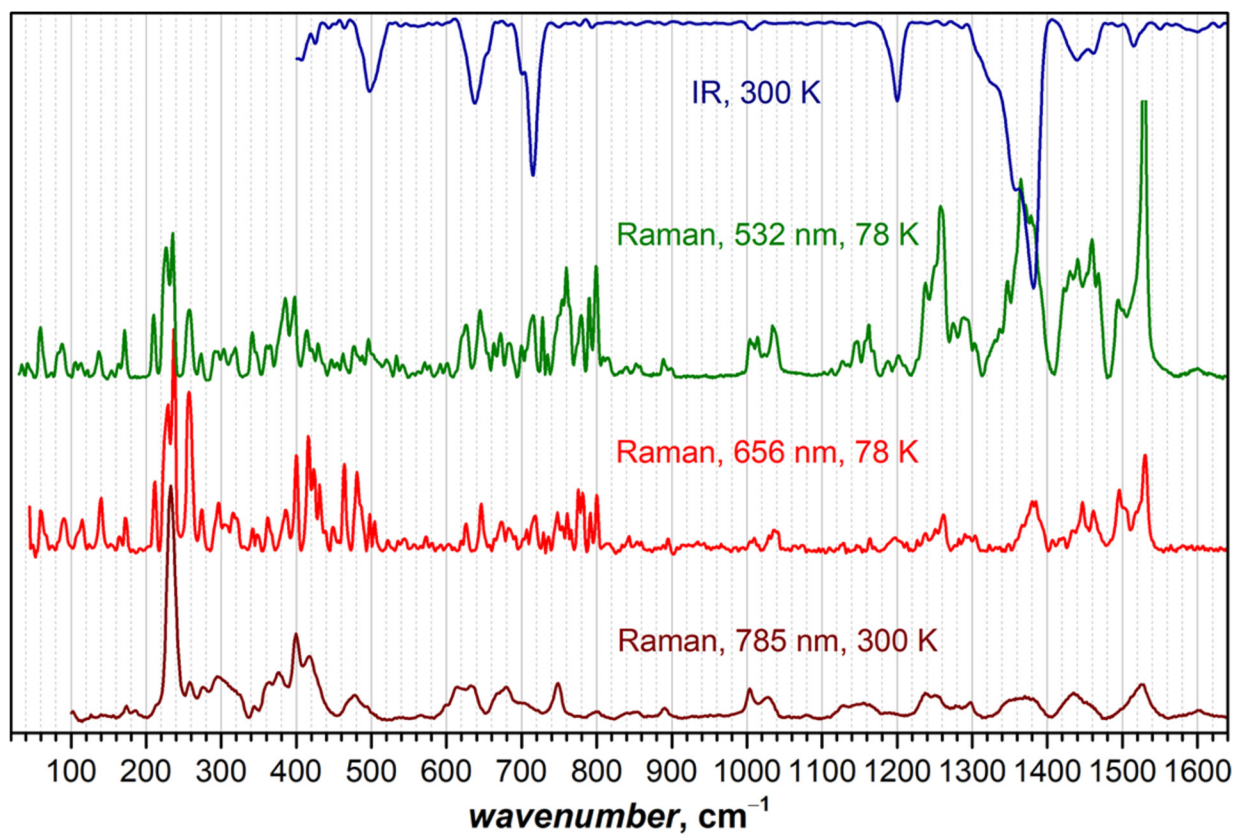

**Figure S5.** FTIR (dark blue trace) and Raman (red and green traces) spectra of NdSc<sub>2</sub>N@C<sub>80</sub> drop-casted on KBr substrate. Raman spectra were excited at 532 and 660 nm and measured at 78 K. Brown trace is the Raman spectrum of NdSc<sub>2</sub>N@C<sub>80</sub> drop-casted on gold SERS substrate and measured at room temperature with the excitation at 785 nm.

### Single-crystal X-ray diffraction

Molecular structure of  $\text{NdSc}_2\text{N}@I_h\text{-C}_{80}$  was established by single-crystal X-ray diffraction using a co-crystal with nickel(II) octaethylporphyrin (NiOEP) grown by layering solutions of fullerene in benzene and NiOEP in benzene and allowing slow diffusion thereof for one month. Measurements were performed at 100 K with synchrotron irradiation at the BESSY storage ring (BL14.2, Berlin-Adlershof, Germany).<sup>1</sup> XDSAPP2.0 suite was employed for data processing.<sup>2, 3</sup> The structure was solved by direct methods and refined by SHELXL-2018.<sup>4</sup>

**Table S1. Crystal data.**

|                                                       |                                                                                   |
|-------------------------------------------------------|-----------------------------------------------------------------------------------|
| <b>Crystal</b>                                        | <b><math>\text{NdSc}_2\text{N}@C_{80} \cdot \text{NiOEP} \cdot 2C_6H_6</math></b> |
| <b>Formula</b>                                        | $C_{128}H_{56}N_5NdNiSc_2$                                                        |
| <b>Formula weight</b>                                 | 1956.64                                                                           |
| <b>Color, habit</b>                                   | Black, block                                                                      |
| <b>Crystal system</b>                                 | monoclinic                                                                        |
| <b>Space group</b>                                    | $C2/c$                                                                            |
| <b><math>a</math>, Å</b>                              | 25.300(5)                                                                         |
| <b><math>b</math>, Å</b>                              | 14.980(3)                                                                         |
| <b><math>c</math>, Å</b>                              | 39.470(8)                                                                         |
| <b><math>\alpha</math>, deg</b>                       | 90                                                                                |
| <b><math>\beta</math>, deg</b>                        | 95.44(3)                                                                          |
| <b><math>\gamma</math>, deg</b>                       | 90                                                                                |
| <b>Volume, Å<sup>3</sup></b>                          | 14892(5)                                                                          |
| <b><math>Z</math></b>                                 | 8                                                                                 |
| <b><math>T</math>, K</b>                              | 100                                                                               |
| <b>Radiation (<math>\lambda</math>, Å)</b>            | Synchrotron Radiation (0.82656)                                                   |
| <b>Unique data (<math>R_{int}</math>)</b>             | 19096 (0.0409)                                                                    |
| <b>Parameters</b>                                     | 1242                                                                              |
| <b>Restraints</b>                                     | 0                                                                                 |
| <b>Observed data (<math>I &gt; 2\sigma(I)</math>)</b> | 18607                                                                             |
| <b><math>R_1^a</math> (observed data)</b>             | 0.0457                                                                            |
| <b><math>wR_2^b</math> (all data)</b>                 | 0.1360                                                                            |
| <b>CCDC No.</b>                                       | 2194854                                                                           |

<sup>a</sup>For data with  $I > 2\sigma(I)$ ,  $R_1 = \frac{\sum||F_o|-|F_c||}{\sum|F_o|}$ . <sup>b</sup>For all data,  $wR_2 = \sqrt{\frac{\sum[w(F_o^2-F_c^2)^2]}{\sum[w(F_o^2)^2]}}$ .

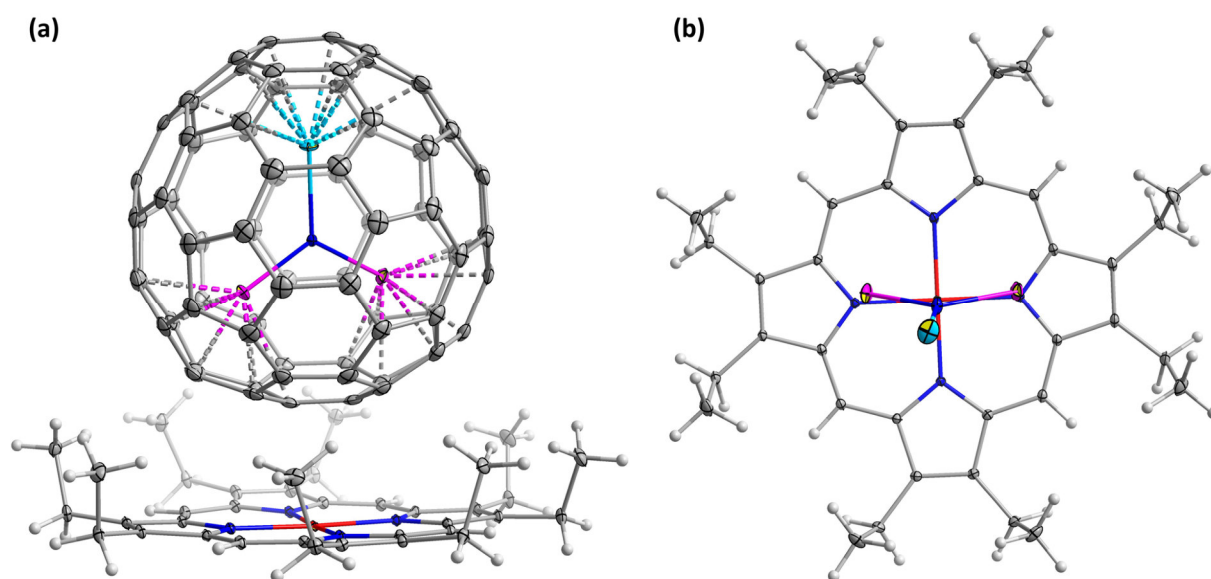

**Figure S6.** (a) Single-crystal X-ray structures of  $\text{NdSc}_2\text{N}@C_{80}\cdot\text{NiOEP}\cdot 2\text{C}_6\text{H}_6$ , the solvent molecules are omitted for clarity. (b) View on the same unit along  $\text{Nd}-\text{N}$  bond; to highlight the relative position of the encapsulated  $\text{NdSc}_2\text{N}$  to the  $\text{NiOEP}$ , the fullerene cage  $C_{80}$  and the solvent molecules are omitted. The displacement parameters are shown at the 30% probability. Color code: grey for carbon, blue for nitrogen, white for hydrogen, red for nickel, pink for scandium, and cyan for neodymium.

# DFT calculations of molecular structures

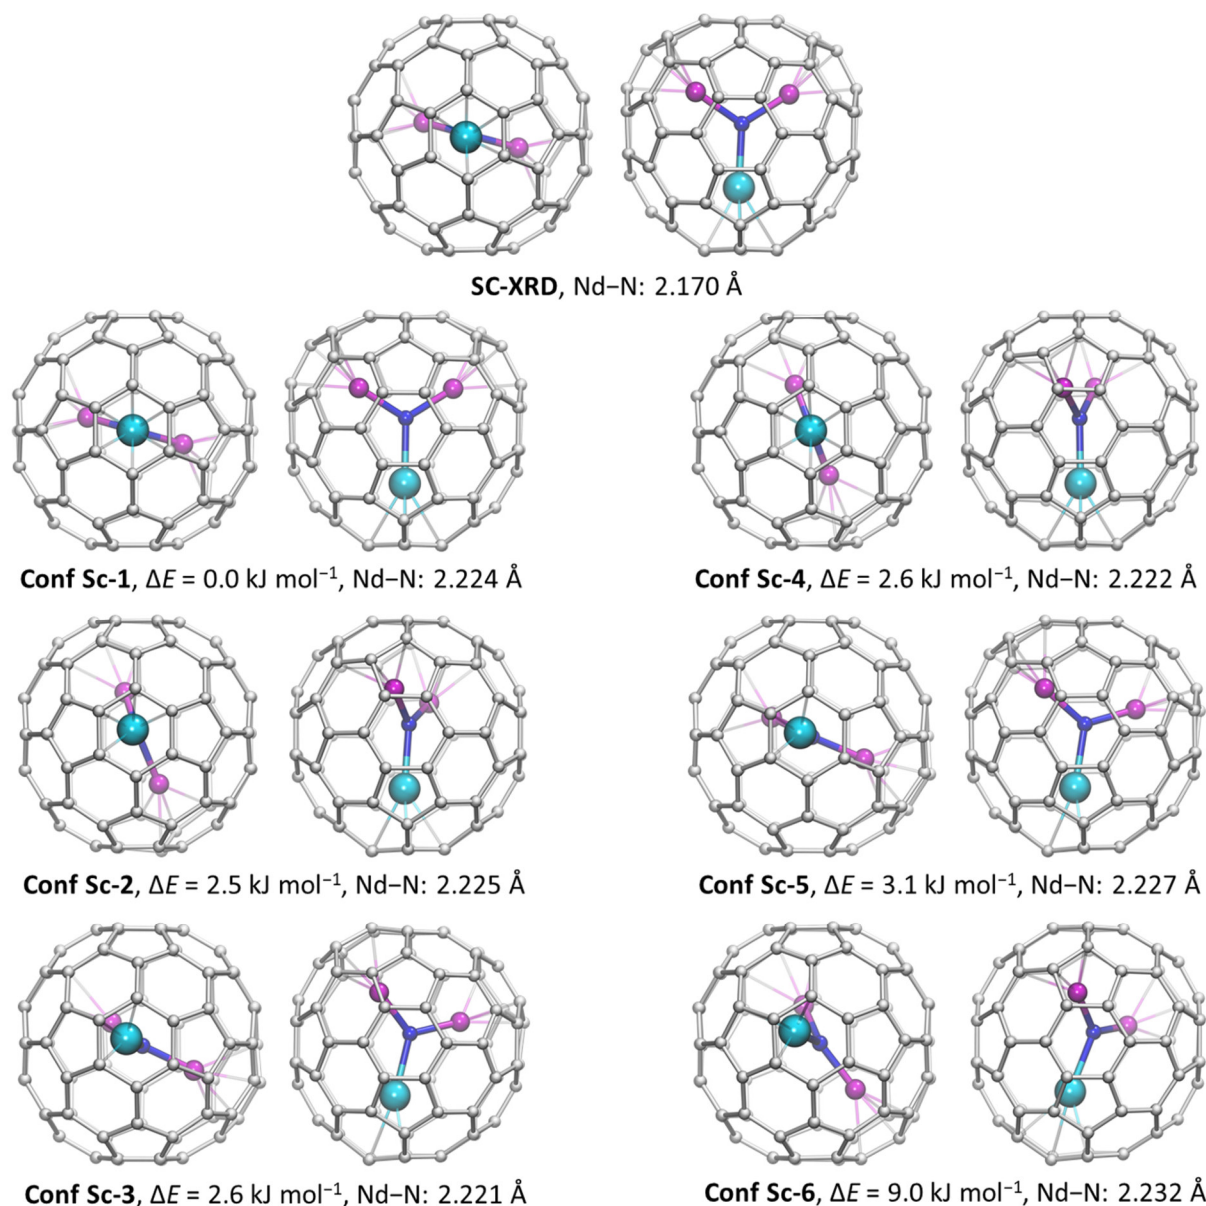

**Figure S7.** Six unique conformers of  $\text{NdSc}_2\text{N}@C_{80}$  (conf **Sc-1** – conf **Sc-6**) found in DFT survey of 120 initial configurations, with their relative energies and DFT-optimized Nd–N bond lengths. Each structure is shown in two orientations. For comparison, SC-XRD structure is also shown on top. Orientation of the  $\text{NdSc}_2\text{N}$  cluster in the most stable conf **Sc-1** is very similar to the experimental structure. Color code: Nd – cyan, Sc – magenta, N – blue, C – light gray. Sc–C distances shorter than 2.4 Å for and Nd–C distances shorter than 2.6 Å are shown as bonds.

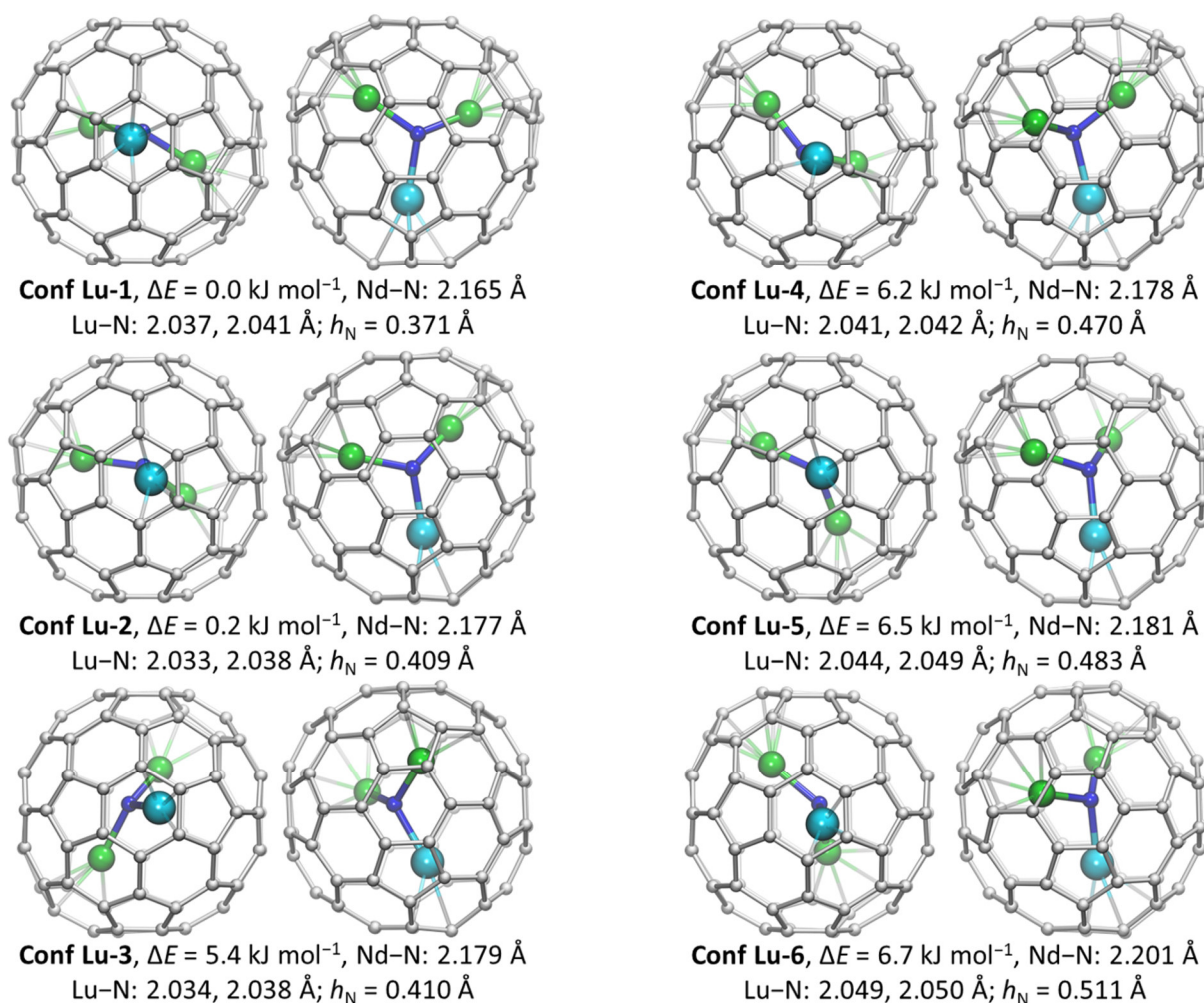

**Figure S8.** Six lowest-energy conformers of  $\text{NdLu}_2\text{N}@C_{80}$  (conf **Lu-1** – conf **Lu-6**) found in DFT survey with their relative energies and selected structural parameters ( $h_N$  is the height of the pyramid formed by elevation of nitrogen above the plane of three metals). Color code: Nd – cyan, Lu – green, N – blue, C – light gray. Lu–C distances shorter than 2.5 Å for and Nd–C distances shorter than 2.6 Å are shown as bonds.

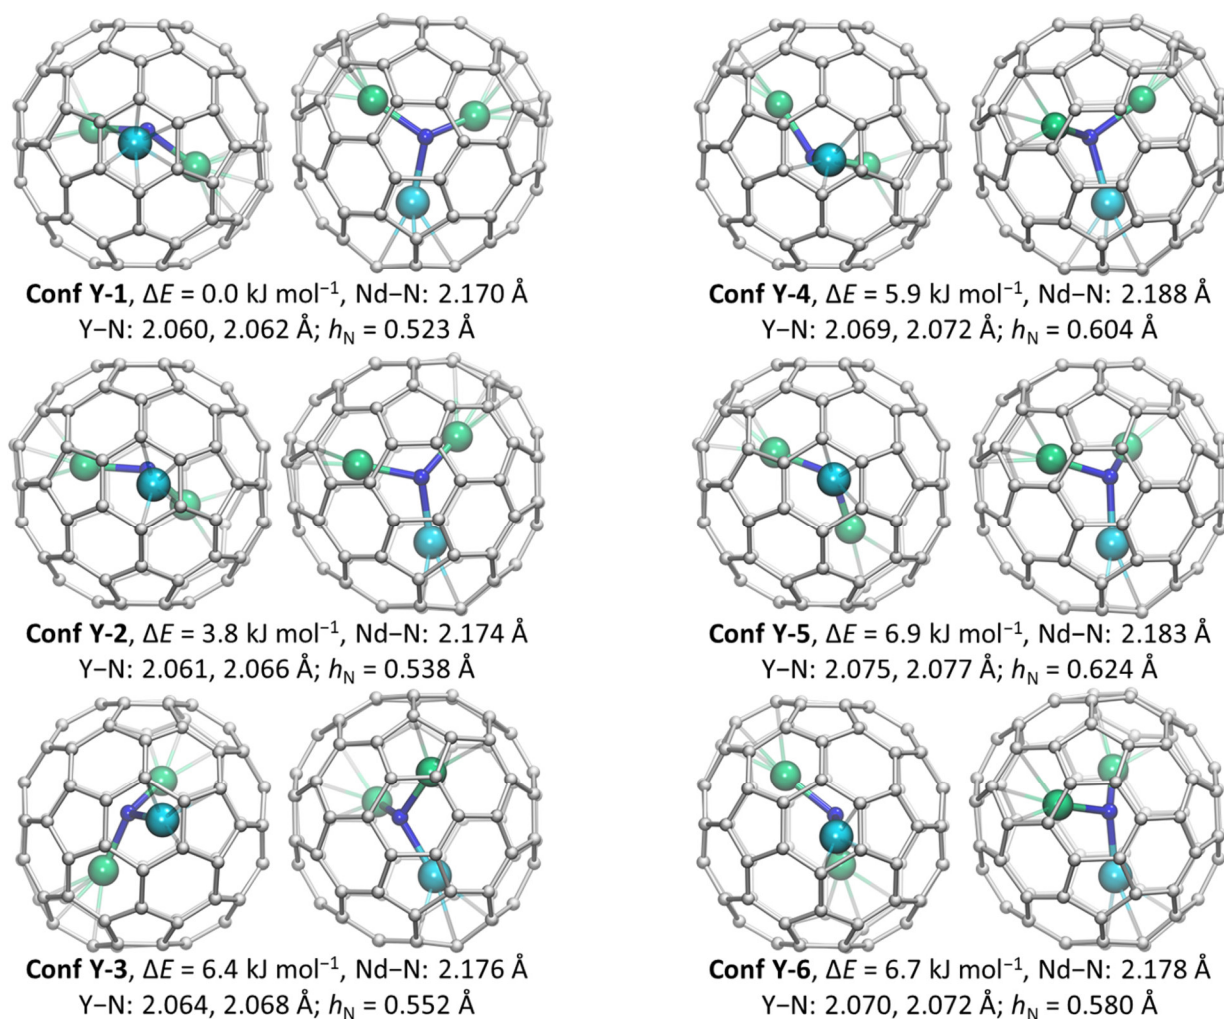

**Figure S9.** Six lowest-energy conformers of  $\text{NdY}_2\text{N}@C_{80}$  (conf Y-1 – conf Y-6) found in DFT survey with their relative energies and selected structural parameters ( $h_N$  is the height of the pyramid formed by elevation of nitrogen above the plane of three metals). Color code: Nd – cyan, Y – green, N – blue, C – light gray. Y–C distances shorter than 2.5 Å for and Nd–C distances shorter than 2.6 Å are shown as bonds.

### Photoluminescence decay

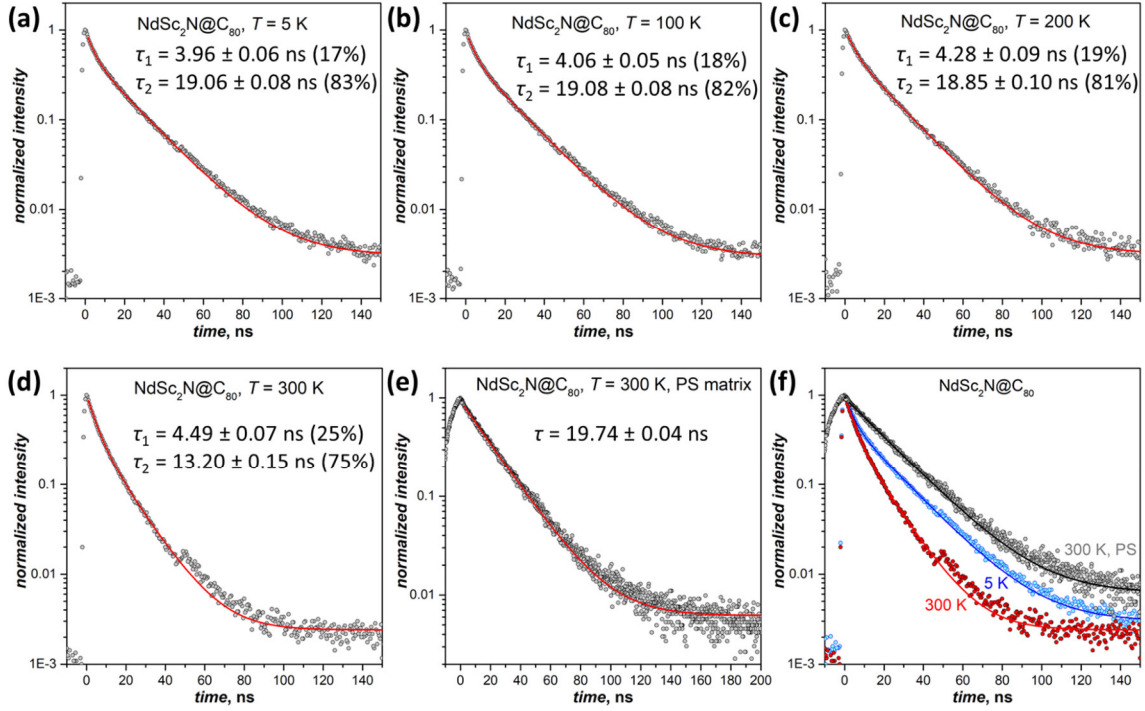

**Figure S10.** Luminescence decay curves of  $\text{NdSc}_2\text{N@C}_{80}$ , laser excitation at 488 nm. (a)-(d) polycrystalline sample, 5–300 K, fit with bi-exponential decay; (e) polystyrene (PS) matrix, 300 K, fit with mono-exponential decay; (f) comparison of polycrystalline (5 K, blue; 300 K, red) and polystyrene (300 K, gray).

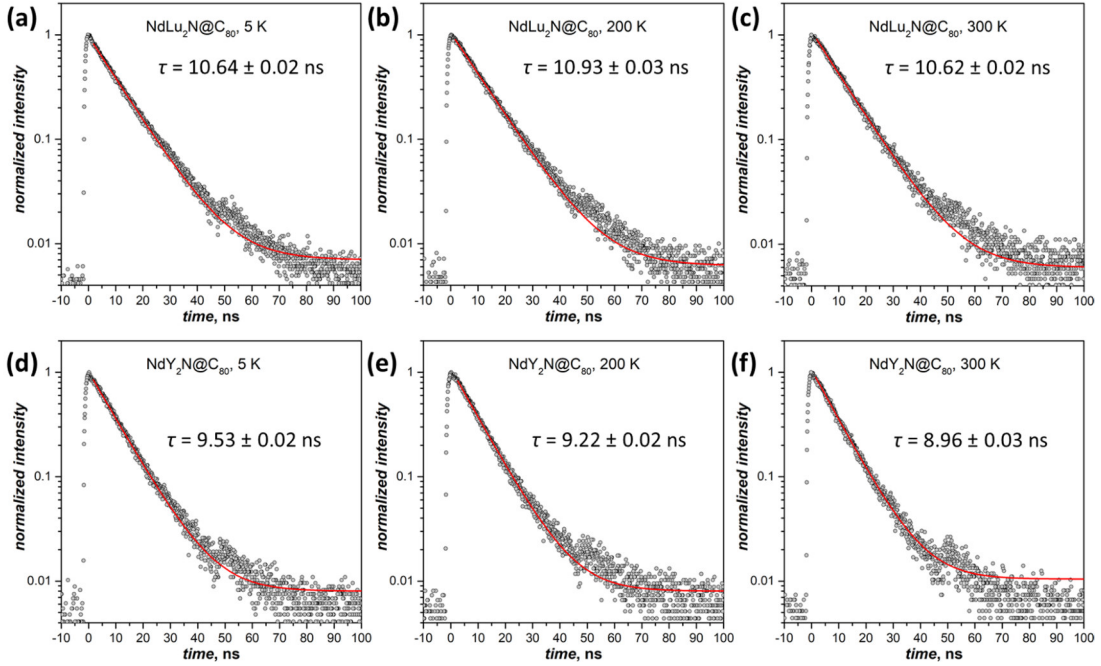

**Figure S11.** Luminescence decay curves of polycrystalline  $\text{NdLu}_2\text{N@C}_{80}$  (a-c) and  $\text{NdY}_2\text{N@C}_{80}$  (d-e), laser excitation at 488 nm;  $T = 5$  K, 200 K, and 300 K.

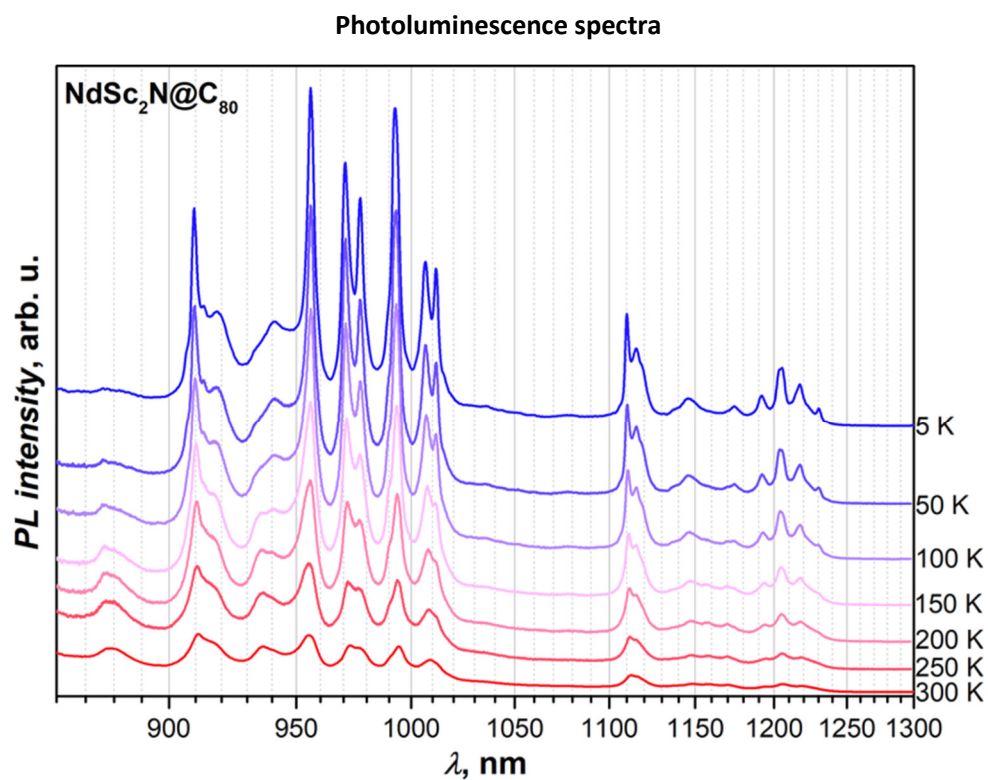

**Figure S12.** Photoluminescence spectra of polycrystalline  $\text{NdSc}_2\text{N@C}_{80}$  in the range of 860–1300 nm ( $^4\text{F}_{3/2} \rightarrow ^4\text{I}_{9/2}$  and  $^4\text{F}_{3/2} \rightarrow ^4\text{I}_{11/2}$  bands) measured at different temperatures, excitation with 488 nm laser line.

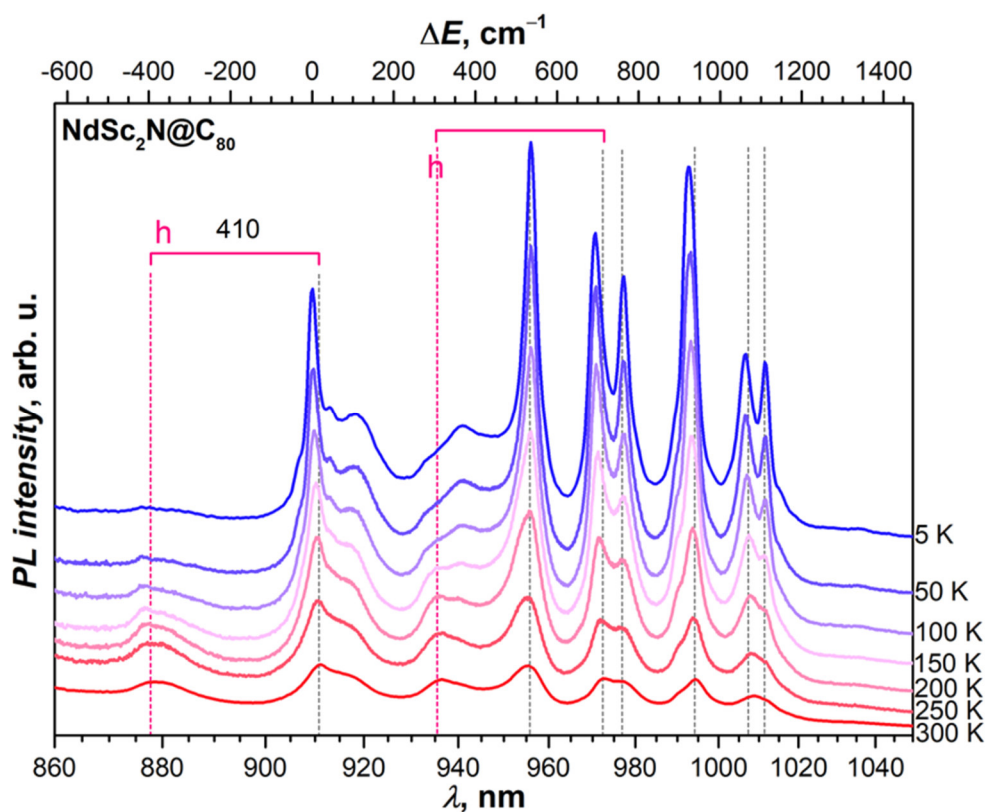

**Figure S13.** VT-PL spectra of polycrystalline  $\text{NdSc}_2\text{N@C}_{80}$  in the range of the  $^4\text{F}_{3/2} \rightarrow ^4\text{I}_{9/2}$  band, excitation with 488 nm laser line. The features disappearing upon cooling are assigned to hot bands and marked with **h**, the ligand field splitting in the  $^4\text{F}_{3/2}$  excited state is estimated as  $385 \text{ cm}^{-1}$ .

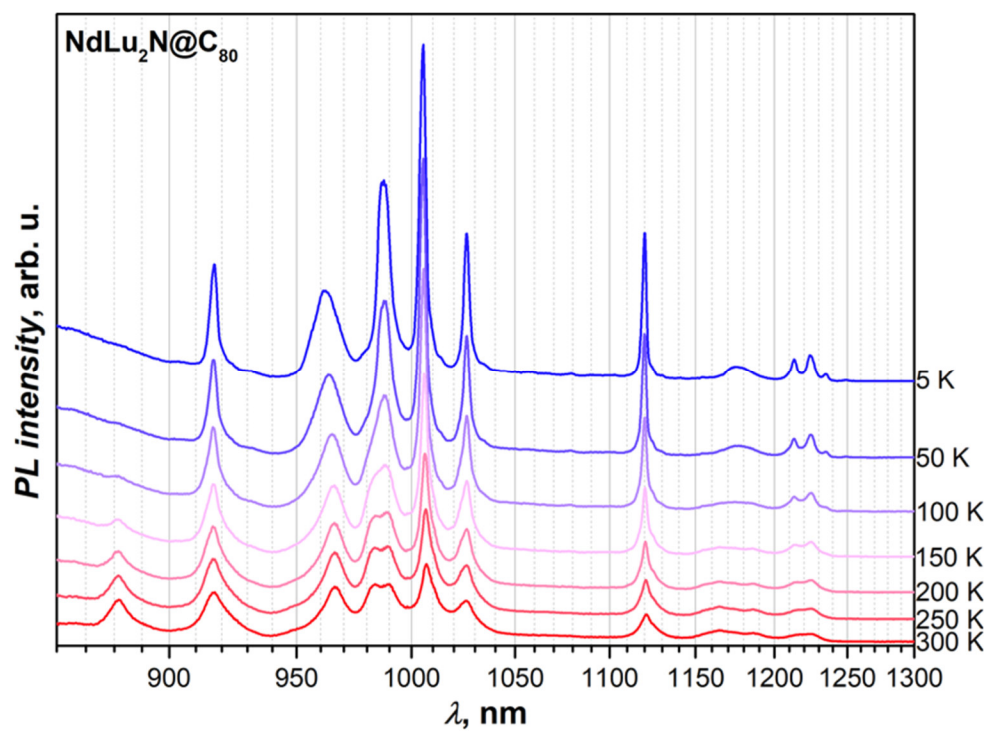

**Figure S14.** Photoluminescence spectra of polycrystalline  $\text{NdLu}_2\text{N}@C_{80}$  in the range of 860–1300 nm ( $^4F_{3/2} \rightarrow ^4I_{9/2}$  and  $^4F_{3/2} \rightarrow ^4I_{11/2}$  bands) measured at different temperatures, excitation with 488 nm laser line.

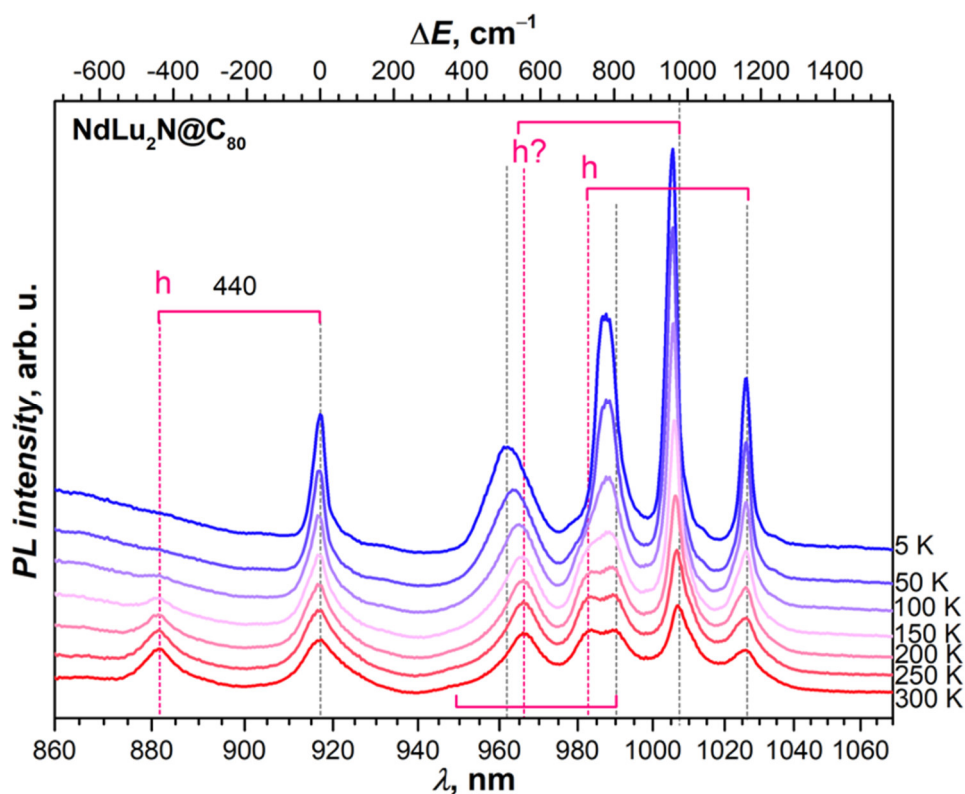

**Figure S15.** VT-PL spectra of polycrystalline NdLu<sub>2</sub>N@C<sub>80</sub> in the range of the  $^4F_{3/2} \rightarrow ^4I_{9/2}$  band, excitation with 488 nm laser line. The features disappearing upon cooling are assigned to hot bands and marked with **h**, the ligand field splitting in the  $^4F_{3/2}$  excited state is estimated as 440 cm<sup>-1</sup>. Assignment of the peak at 960-965 nm is rather ambiguous. The temperature shift of this peak is considerably stronger than for other peaks, and we suggest that the two features occur at close energies: the hot band visible at room temperature, and the broadened KD transition, which becomes distinguishable at lower temperature, when intensity of the hot band gradually decreases. The apparent shift during cooling is the result of the hot band disappearance.

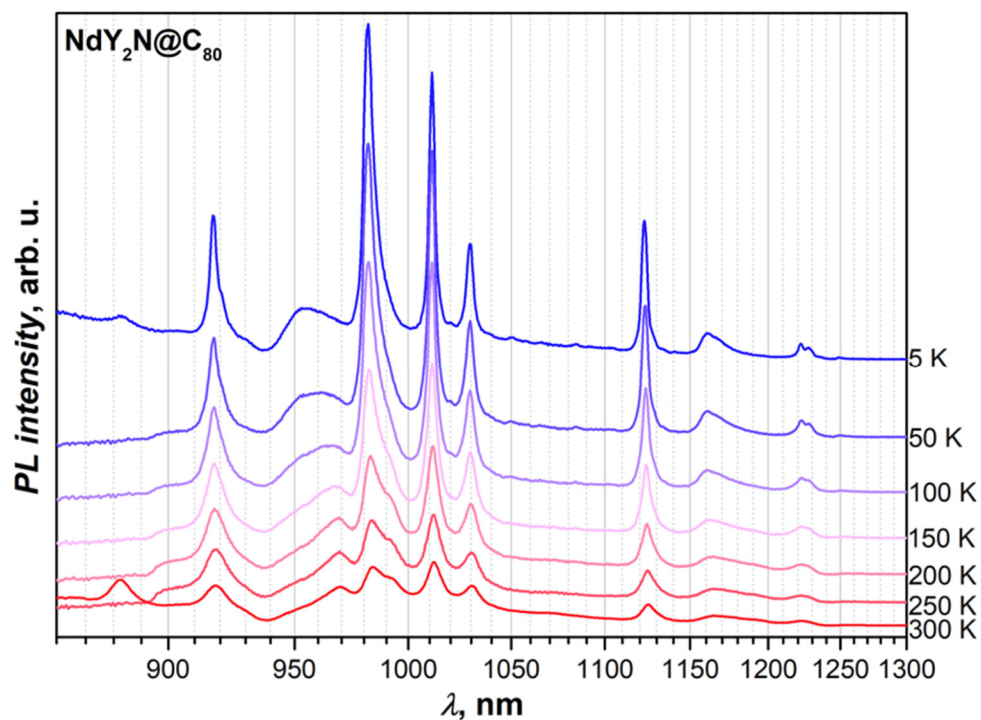

**Figure S16.** Photoluminescence spectra of polycrystalline  $\text{NdY}_2\text{N@C}_{80}$  in the range of 860–1300 nm ( $^4\text{F}_{3/2} \rightarrow ^4\text{I}_{9/2}$  and  $^4\text{F}_{3/2} \rightarrow ^4\text{I}_{11/2}$  bands) measured at different temperatures, excitation with 488 nm laser line. In the spectra measured between 50 K and 250 K, the bandpass filter with a threshold of 890 nm cuts the short-wavelengths part, thus the hot band at 880 nm is not seen.

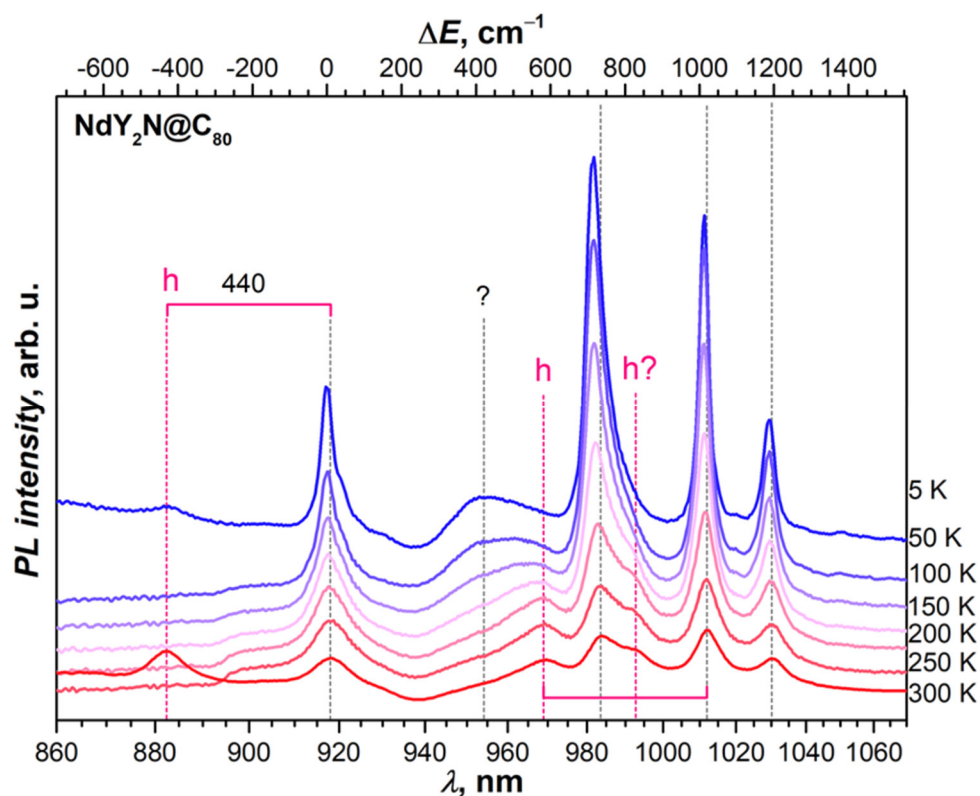

**Figure S17.** VT-PL spectra of polycrystalline  $\text{NdY}_2\text{N@C}_{80}$  in the range of the  $^4\text{F}_{3/2} \rightarrow ^4\text{I}_{9/2}$  band, excitation with 488 nm laser line. The features disappearing upon cooling are assigned to hot bands and marked with **h**, the ligand field splitting in the  $^4\text{F}_{3/2}$  excited state is estimated as  $440 \text{ cm}^{-1}$ . In the spectra measured between 50 K and 250 K, the bandpass filter with a threshold of 890 nm cuts the short-wavelengths part, thus the hot band at 880 nm is not seen. Assignment of the broad asymmetric peak at 955 nm ( $\Delta E \approx 400 \text{ cm}^{-1}$ ), which becomes visible only at low temperature, is not very clear. We tentatively assign it to the transition ending at KD2 of the ground state multiplet, but it remains ambiguous because of its very large width different from features of all other pure transitions of this type. Another feature with questionable assignment is at 992 nm (labelled “h?”). Its temperature evolution corresponds to that of hot bands, but the energy does not match.

**Table S2.** LF splitting in  $^4I_1$  and  $^4F_{3/2}$  multiplets of NdSc<sub>2</sub>N@C<sub>80</sub>, NdLu<sub>2</sub>N@C<sub>80</sub>, and NdY<sub>2</sub>N@C<sub>80</sub>, determined from low-temperature PL measurements.

| multiplet    | KD  | free ion | NdSc <sub>2</sub> N@C <sub>80</sub> |           | NdLu <sub>2</sub> N@C <sub>80</sub> |          | NdY <sub>2</sub> N@C <sub>80</sub> |        |
|--------------|-----|----------|-------------------------------------|-----------|-------------------------------------|----------|------------------------------------|--------|
|              |     |          | E                                   | ΔE        | E                                   | ΔE       | E                                  | ΔE     |
| $^4I_{9/2}$  | KD1 | 0        | 0                                   | 0         | 0                                   | 0        | 0                                  | 0      |
|              | KD2 |          |                                     | 536       |                                     | 510 v br | 420                                | v br   |
|              | KD3 |          |                                     | 693/763   |                                     | 775      | 711                                |        |
|              | KD4 |          |                                     | 923       |                                     | 958      | 1005                               |        |
|              | KD5 |          |                                     | 1061/1110 | 1161                                | 1161     | 1188                               | 1188   |
| $^4I_{11/2}$ | KD1 | 1897     | 1987                                | 0         | 1976                                | 0        | 1995                               | 0      |
|              | KD2 |          |                                     | 492       |                                     | 430 v br | 295                                | v br   |
|              | KD3 |          |                                     | 618       |                                     | 687      | 725                                |        |
|              | KD4 |          |                                     | 701/712   |                                     | 761      | 760                                |        |
|              | KD5 |          |                                     | 793       |                                     | 832      | 815                                | sh, vw |
|              | KD6 |          | 2869                                | 880       | 2899                                | 923 vw   | 2895                               | 900 vw |
| $^4I_{13/2}$ | KD1 | 3907     | 3890                                | 0         |                                     |          |                                    |        |
|              | KD2 |          |                                     | 535       |                                     |          |                                    |        |
|              | KD3 |          |                                     | 632       | 4318                                |          |                                    |        |
|              | KD4 |          |                                     | 682       | 4435                                |          | 4299                               |        |
|              | KD5 |          |                                     | 788       | 4572                                |          | 4420                               |        |
|              | KD6 |          |                                     | 810       | 4659                                |          | 4607                               |        |
|              | KD7 |          | 4781                                | 890       | 4695                                |          | 4668                               |        |
| $^4F_{3/2}$  | KD1 | 11699    | 10996                               | 0         | 10906                               | 0        | 10901                              | 0      |
|              | KD2 |          | 11406                               | 410       | 11346                               | 440      | 11341                              | 440    |

The free-ion energies of Nd<sup>3+</sup> multiplets are from Ref. <sup>14</sup>

For the  $^4I_{13/2}$  multiplet in NdLu<sub>2</sub>N@C<sub>80</sub> and NdY<sub>2</sub>N@C<sub>80</sub>, we cannot identify KD1 peaks and thus ΔE values are not available, and the table lists absolute values of observed features. Their assignment to particular KDs is ambiguous.

Additional designations: “v br” – very broad, “vw” – very weak, “sh” – shoulder

**Ab initio calculations of ligand-field splitting, pseudospin g-tensors, and state compositions**

**Table S3a.** Ligand-field splitting of  $\text{Nd}^{3+}\text{-}^4\text{I}_{9/2}$  multiplet in  $\text{NdSc}_2\text{N@C}_{80}$  (**Conf Sc-1**) computed at the CASSCF/RASSI level.

| KD | exp. $E$<br>$\text{cm}^{-1}$ | calc. $E$<br>$\text{cm}^{-1}$ | % composition in $ J, m_J\rangle$ basis ( $J = 9/2$ )                         | $g_x$  | $g_y$  | $g_z$  | $\phi^\circ$ |
|----|------------------------------|-------------------------------|-------------------------------------------------------------------------------|--------|--------|--------|--------------|
| 1  | 0                            | 0                             | $95 \pm 9/2\rangle$                                                           | 0.1383 | 0.2390 | 6.1923 | 0            |
| 2  | 536                          | 80                            | $79 \pm 7/2\rangle + 19 \pm 5/2\rangle$                                       | 0.4280 | 0.7394 | 4.5918 | 21           |
| 3  | 693/763                      | 435                           | $82 \pm 1/2\rangle + 12 \pm 3/2\rangle$                                       | 2.3892 | 4.0148 | 0.9780 | 10           |
| 4  | 923                          | 594                           | $45 \pm 3/2\rangle + 37 \pm 5/2\rangle + 11 \pm 7/2\rangle$                   | 3.6651 | 2.8343 | 0.0690 | 13           |
| 5  | 1061/1110                    | 693                           | $42 \pm 5/2\rangle + 40 \pm 3/2\rangle + 9 \pm 1/2\rangle + 8 \pm 7/2\rangle$ | 3.7346 | 2.4854 | 1.0045 | 4            |

total contribution of  $B_q^2$ ,  $B_q^4$ , and  $B_q^6$  terms to LF splitting: 94.2%; angle between  $g_z$  axis of KD1 and Nd–N bond is  $7.6^\circ$

**Table S3b.** Ligand-field splitting of  $\text{Nd}^{3+}\text{-}^4\text{I}_{9/2}$  multiplet in  $\text{NdSc}_2\text{N@C}_{80}$  (**Conf Sc-2**) computed at the CASSCF/RASSI level.

| KD | exp. $E$<br>$\text{cm}^{-1}$ | calc. $E$<br>$\text{cm}^{-1}$ | % composition in $ J, m_J\rangle$ basis ( $J = 9/2$ )                           | $g_x$  | $g_y$  | $g_z$  | $\phi^\circ$ |
|----|------------------------------|-------------------------------|---------------------------------------------------------------------------------|--------|--------|--------|--------------|
| 1  | 0                            | 0                             | $89 \pm 9/2\rangle + 6 \pm 3/2\rangle$                                          | 0.1089 | 0.1440 | 5.8548 | 0            |
| 2  | 536                          | 245                           | $46 \pm 5/2\rangle + 37 \pm 7/2\rangle + 8 \pm 3/2\rangle + 5 \pm 9/2\rangle$   | 0.4295 | 0.6190 | 5.2451 | 42           |
| 3  | 693/763                      | 506                           | $42 \pm 3/2\rangle + 25 \pm 1/2\rangle + 18 \pm 5/2\rangle + 11 \pm 7/2\rangle$ | 0.5248 | 1.4336 | 4.7754 | 65           |
| 4  | 923                          | 687                           | $37 \pm 7/2\rangle + 28 \pm 3/2\rangle + 20 \pm 5/2\rangle + 15 \pm 1/2\rangle$ | 0.2309 | 1.9113 | 4.3511 | 55           |
| 5  | 1061/1110                    | 795                           | $55 \pm 1/2\rangle + 17 \pm 3/2\rangle + 14 \pm 7/2\rangle + 13 \pm 5/2\rangle$ | 3.6984 | 2.9214 | 0.7692 | 4            |

total contribution of  $B_q^2$ ,  $B_q^4$ , and  $B_q^6$  terms to LF splitting: 94.7%; angle between  $g_z$  axis of KD1 and Nd–N bond is  $12.8^\circ$

**Table S3c.** Ligand-field splitting of  $\text{Nd}^{3+}\text{-}^4\text{I}_{9/2}$  multiplet in  $\text{NdSc}_2\text{N@C}_{80}$  (**Conf Sc-3**) computed at the CASSCF/RASSI level.

| KD | exp. $E$<br>$\text{cm}^{-1}$ | calc. $E$<br>$\text{cm}^{-1}$ | % composition in $ J, m_J\rangle$ basis ( $J = 9/2$ )                           | $g_x$  | $g_y$  | $g_z$  | $\phi^\circ$ |
|----|------------------------------|-------------------------------|---------------------------------------------------------------------------------|--------|--------|--------|--------------|
| 1  | 0                            | 0                             | $85 \pm 9/2\rangle + 7 \pm 5/2\rangle + 6 \pm 3/2\rangle$                       | 0.0371 | 0.0445 | 5.6890 | 0            |
| 2  | 536                          | 467                           | $48 \pm 5/2\rangle + 25 \pm 7/2\rangle + 19 \pm 3/2\rangle + 8 \pm 1/2\rangle$  | 0.5312 | 1.3555 | 3.1828 | 21           |
| 3  | 693/763                      | 648                           | $31 \pm 3/2\rangle + 29 \pm 5/2\rangle + 19 \pm 7/2\rangle + 14 \pm 9/2\rangle$ | 0.0369 | 1.0730 | 3.6643 | 25           |
| 4  | 923                          | 786                           | $48 \pm 7/2\rangle + 30 \pm 3/2\rangle + 14 \pm 1/2\rangle + 8 \pm 5/2\rangle$  | 2.0524 | 0.3009 | 3.7618 | 55           |
| 5  | 1061/1110                    | 968                           | $70 \pm 1/2\rangle + 14 \pm 3/2\rangle + 8 \pm 5/2\rangle + 8 \pm 7/2\rangle$   | 4.3734 | 2.4200 | 0.4013 | 7            |

total contribution of  $B_q^2$ ,  $B_q^4$ , and  $B_q^6$  terms to LF splitting: 95.7%; angle between  $g_z$  axis of KD1 and Nd–N bond is  $5.1^\circ$

**Table S3d.** Ligand-field splitting of  $\text{Nd}^{3+}\text{-}^4\text{I}_{9/2}$  multiplet in  $\text{NdSc}_2\text{N@C}_{80}$  (**conf Sc-4**) computed at the CASSCF/RASSI level.

| KD | exp. $E$<br>$\text{cm}^{-1}$ | calc. $E$<br>$\text{cm}^{-1}$ | % composition in $ J, m_J\rangle$ basis ( $J = 9/2$ )       | $g_x$  | $g_y$  | $g_z$  | $\phi^\circ$ |
|----|------------------------------|-------------------------------|-------------------------------------------------------------|--------|--------|--------|--------------|
| 1  | 0                            | 0                             | $95 \pm 9/2\rangle$                                         | 0.0689 | 0.1472 | 6.1974 | 0            |
| 2  | 536                          | 80                            | $89 \pm 7/2\rangle + 10 \pm 5/2\rangle$                     | 0.5051 | 0.6936 | 4.5465 | 15           |
| 3  | 693/763                      | 421                           | $80 \pm 1/2\rangle + 13 \pm 3/2\rangle$                     | 4.9986 | 1.4867 | 0.7820 | 6            |
| 4  | 923                          | 601                           | $43 \pm 3/2\rangle + 40 \pm 5/2\rangle + 13 \pm 1/2\rangle$ | 2.2240 | 4.3204 | 0.1389 | 10           |
| 5  | 1061/1110                    | 690                           | $46 \pm 5/2\rangle + 42 \pm 3/2\rangle$                     | 3.4567 | 2.9098 | 1.0030 | 3            |

total contribution of  $B_q^2$ ,  $B_q^4$ , and  $B_q^6$  terms to LF splitting: 95.0%; angle between  $g_z$  axis of KD1 and Nd–N bond is  $5.4^\circ$

**Table S3e.** Ligand-field splitting of  $\text{Nd}^{3+}\text{-}^4\text{I}_{9/2}$  multiplet in  $\text{NdSc}_2\text{N@C}_{80}$  (**conf Sc-5**) computed at the CASSCF/RASSI level.

| KD | exp. $E$<br>$\text{cm}^{-1}$ | calc. $E$<br>$\text{cm}^{-1}$ | % composition in $ J, m_J\rangle$ basis ( $J = 9/2$ )                           | $g_x$  | $g_y$  | $g_z$  | $\phi^\circ$ |
|----|------------------------------|-------------------------------|---------------------------------------------------------------------------------|--------|--------|--------|--------------|
| 1  | 0                            | 0                             | $85 \pm 9/2\rangle + 9 \pm 5/2\rangle + 4 \pm 3/2\rangle$                       | 0.0598 | 0.0680 | 5.7433 | 0            |
| 2  | 536                          | 407                           | $39 \pm 5/2\rangle + 33 \pm 7/2\rangle + 22 \pm 3/2\rangle + 4 \pm 1/2\rangle$  | 0.3974 | 1.0496 | 4.4761 | 48           |
| 3  | 693/763                      | 605                           | $37 \pm 5/2\rangle + 32 \pm 3/2\rangle + 12 \pm 9/2\rangle + 11 \pm 1/2\rangle$ | 0.0528 | 0.5621 | 4.3728 | 64           |
| 4  | 923                          | 740                           | $50 \pm 7/2\rangle + 25 \pm 3/2\rangle + 17 \pm 1/2\rangle + 7 \pm 5/2\rangle$  | 3.6471 | 0.5442 | 2.6493 | 45           |
| 5  | 1061/1110                    | 907                           | $65 \pm 1/2\rangle + 18 \pm 3/2\rangle + 9 \pm 5/2\rangle + 8 \pm 7/2\rangle$   | 4.4537 | 2.3083 | 0.3923 | 5            |

total contribution of  $B_q^2$ ,  $B_q^4$ , and  $B_q^6$  terms to LF splitting: 95.9%; angle between  $g_z$  axis of KD1 and Nd–N bond is  $9.0^\circ$

**Table S3f.** Ligand-field splitting of  $\text{Nd}^{3+}\text{-}^4\text{I}_{9/2}$  multiplet in  $\text{NdSc}_2\text{N@C}_{80}$  (**conf Sc-6**) computed at the CASSCF/RASSI level.

| KD | exp. $E$<br>$\text{cm}^{-1}$ | calc. $E$<br>$\text{cm}^{-1}$ | % composition in $ J, m_J\rangle$ basis ( $J = 9/2$ )                           | $g_x$  | $g_y$  | $g_z$  | $\phi^\circ$ |
|----|------------------------------|-------------------------------|---------------------------------------------------------------------------------|--------|--------|--------|--------------|
| 1  | 0                            | 0                             | $84 \pm 9/2\rangle + 10 \pm 3/2\rangle + 4 \pm 5/2\rangle$                      | 0.0284 | 0.0322 | 5.6347 | 0            |
| 2  | 536                          | 471                           | $57 \pm 5/2\rangle + 21 \pm 7/2\rangle + 13 \pm 3/2\rangle + 6 \pm 1/2\rangle$  | 0.8164 | 1.2241 | 3.5071 | 38           |
| 3  | 693/763                      | 653                           | $44 \pm 3/2\rangle + 25 \pm 7/2\rangle + 14 \pm 5/2\rangle + 11 \pm 9/2\rangle$ | 0.9084 | 1.1718 | 3.3145 | 29           |
| 4  | 923                          | 868                           | $42 \pm 7/2\rangle + 26 \pm 3/2\rangle + 17 \pm 5/2\rangle + 14 \pm 1/2\rangle$ | 0.6707 | 1.9142 | 3.4280 | 40           |
| 5  | 1061/1110                    | 1018                          | $66 \pm 1/2\rangle + 15 \pm 3/2\rangle + 10 \pm 7/2\rangle + 8 \pm 5/2\rangle$  | 3.9823 | 2.6212 | 0.5579 | 13           |

total contribution of  $B_q^2$ ,  $B_q^4$ , and  $B_q^6$  terms to LF splitting: 94.9%; angle between  $g_z$  axis of KD1 and Nd–N bond is  $0.6^\circ$

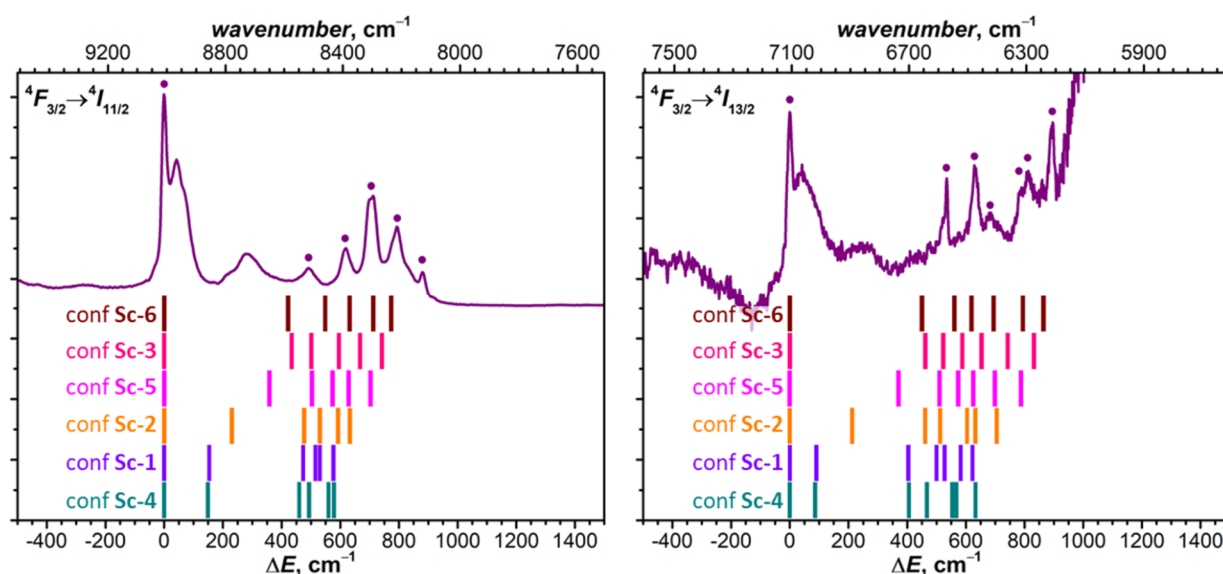

**Figure S18.** The fine structure of  ${}^4F_{3/2} \rightarrow {}^4I_{11/2}$  (left) and  ${}^4F_{3/2} \rightarrow {}^4I_{13/2}$  (right) photoluminescence bands of  $\text{NdSc}_2\text{N}@C_{80}$  measured at 5 K compared to LF splitting of  ${}^4I_{11/2}$  and  ${}^4I_{13/2}$  multiplets in six conformers of  $\text{NdSc}_2\text{N}@C_{80}$  from CASSCF calculations (see Fig. S7 for molecular structures and Tables S3a-S3f for energies of LF states). While conformers **Sc-3** and **Sc-6** give reasonable agreement to the experimental spectra of LF states (except for some systematic underestimation of the splitting by ca 10%), the lowest-energy conformer **Sc-1** is far off. Surprisingly, it appears that only the conformers, in which Nd is coordinated close to one C atom in  $\eta^1$ - $\eta^3$  manner, contribute to the fine structure of PL spectra. At the same time, the broader features at lower energies can be caused by other conformers.

**Table S4.** Experimental (from PL measurements) and calculated (CASSCF) LF splitting in  $^4I_J$  and  $^4F_{3/2}$  multiplets of NdSc<sub>2</sub>N@C<sub>80</sub>.

| multiplet    | KD  | free ion | exp. PL (5 K) |            | Conf 3   |            | Conf 5   |            | Conf 6   |            |
|--------------|-----|----------|---------------|------------|----------|------------|----------|------------|----------|------------|
|              |     |          | <i>E</i>      | $\Delta E$ | <i>E</i> | $\Delta E$ | <i>E</i> | $\Delta E$ | <i>E</i> | $\Delta E$ |
| $^4I_{9/2}$  | KD1 | 0        | 0             | 0          | 0        | 0          | 0        | 0          | 0        | 0          |
|              | KD2 |          |               | 536        |          | 467        |          | 407        |          | 471        |
|              | KD3 |          |               | 693/763    |          | 648        |          | 605        |          | 653        |
|              | KD4 |          |               | 923        |          | 786        |          | 740        |          | 868        |
|              | KD5 |          |               | 1061/1110  |          | 968        |          | 907        |          | 1018       |
| $^4I_{11/2}$ | KD1 | 1897     | 1987          | 0          | 1845     | 0          | 1826     | 0          | 1854     | 0          |
|              | KD2 |          |               | 492        |          | 434        |          | 359        |          | 422        |
|              | KD3 |          |               | 618        |          | 501        |          | 503        |          | 549        |
|              | KD4 |          |               | 701/712    |          | 595        |          | 574        |          | 632        |
|              | KD5 |          |               | 793        |          | 667        |          | 629        |          | 712        |
|              | KD6 |          |               | 880        |          | 741        |          | 703        |          | 773        |
| $^4I_{13/2}$ | KD1 | 3907     | 3890          | 0          | 3828     | 0          | 3813     | 0          | 3837     | 0          |
|              | KD2 |          |               | 535        |          | 461        |          | 370        |          | 450        |
|              | KD3 |          |               | 632        |          | 523        |          | 510        |          | 561        |
|              | KD4 |          |               | 682        |          | 587        |          | 574        |          | 619        |
|              | KD5 |          |               | 788        |          | 653        |          | 626        |          | 695        |
|              | KD6 |          |               | 810        |          | 742        |          | 699        |          | 794        |
|              | KD7 |          |               | 890        |          | 832        |          | 788        |          | 865        |
| $^4I_{15/2}$ | KD1 | 5989     |               |            | 5984     | 0          | 5982     | 0          | 5982     | 0          |
|              | KD2 |          |               |            |          | 545        |          | 494        |          | 566        |
|              | KD3 |          |               |            |          | 662        |          | 578        |          | 692        |
|              | KD4 |          |               |            |          | 779        |          | 723        |          | 789        |
|              | KD5 |          |               |            |          | 805        |          | 762        |          | 864        |
|              | KD6 |          |               |            |          | 949        |          | 910        |          | 1025       |
|              | KD7 |          |               |            |          | 1053       |          | 992        |          | 1129       |
|              | KD8 |          |               |            |          | 1200       |          | 1141       |          | 1252       |
| $^4F_{3/2}$  | KD1 | 11699    | 10996         | 0          | 15879    | 0          | 15841    | 0          | 15887    | 0          |
|              | KD2 |          |               | 410        |          | 401        |          | 393        |          | 421        |

Free-ion energies of Nd<sup>3+</sup> multiplets are from Ref. <sup>14</sup>

**NdSc<sub>2</sub>N@C<sub>80</sub>, conformer Sc-3: CASSCF versus point charge model**

**Table S5a.** Ligand-field splitting and pseudospin g-tensors of Kramers doublets of Nd<sup>3+4</sup>I<sub>9/2</sub> multiplet in NdSc<sub>2</sub>N@C<sub>80</sub> (conf **Sc-3**) computed with point charge model (PCM)\*

| KD | $E, \text{cm}^{-1}$<br>CASSCF | $E \text{ cm}^{-1}$<br>PCM | % composition in $ 9/2, m_J\rangle$ basis            | $g_x$  | $g_y$  | $g_z$  |
|----|-------------------------------|----------------------------|------------------------------------------------------|--------|--------|--------|
| 1  | 0                             | 0                          | 99.9  $\pm 9/2$ $\rangle$                            | 0.0000 | 0.0000 | 6.5437 |
| 2  | 467                           | 466                        | 99.6  $\pm 7/2$ $\rangle$                            | 0.0013 | 0.0014 | 5.0823 |
| 3  | 648                           | 643                        | 99.0  $\pm 5/2$ $\rangle$                            | 0.0937 | 0.1002 | 3.6158 |
| 4  | 786                           | 770                        | 95.0  $\pm 3/2$ $\rangle$ + 4.4  $\pm 1/2$ $\rangle$ | 1.4408 | 1.4927 | 2.0604 |
| 5  | 968                           | 867                        | 94.8  $\pm 1/2$ $\rangle$ + 4.5  $\pm 3/2$ $\rangle$ | 5.0352 | 2.0948 | 0.6166 |

\*PCM used LoProp charges from CASSCF calculations scaled by a factor of 1.08 to reproduce the  $\Delta_{1,2}$  value

**Table S5b.** Ligand-field splitting and pseudospin g-tensors of Kramers doublets of Nd<sup>3+4</sup>I<sub>9/2</sub> multiplet computed at the CASSCF/RASSI level for Nd<sup>3+</sup> ion surrounded by point charges in positions of all other atoms in NdSc<sub>2</sub>N@C<sub>80</sub> (conf **Sc-3**), the charges are the same as used for calculations in Table S5a.

| KD | $E \text{ cm}^{-1}$<br>CASSCF | $E \text{ cm}^{-1}$<br>CASSCF (Nd)+PCM | % composition in $ 9/2, m_J\rangle$ basis            | $g_x$  | $g_y$  | $g_z$  |
|----|-------------------------------|----------------------------------------|------------------------------------------------------|--------|--------|--------|
| 1  | 0                             | 0                                      | 99.9  $\pm 9/2$ $\rangle$                            | 0.0001 | 0.0001 | 6.3448 |
| 2  | 467                           | 466                                    | 99.3  $\pm 7/2$ $\rangle$                            | 0.0030 | 0.0031 | 4.9384 |
| 3  | 648                           | 626                                    | 98.2  $\pm 5/2$ $\rangle$                            | 0.2012 | 0.2244 | 3.4771 |
| 4  | 786                           | 724                                    | 91.3  $\pm 3/2$ $\rangle$ + 7.7  $\pm 1/2$ $\rangle$ | 1.7958 | 1.8647 | 2.0487 |
| 5  | 968                           | 806                                    | 91.1  $\pm 1/2$ $\rangle$ + 7.9  $\pm 3/2$ $\rangle$ | 5.4664 | 1.5738 | 0.4829 |

**Table S5c.** Ligand-field splitting and pseudospin g-tensors of Kramers doublets of Nd<sup>3+4</sup>I<sub>9/2</sub> multiplet computed at the CASSCF/RASSI level for (NdSc<sub>2</sub>N)<sup>6+</sup> cluster surrounded by point charges at positions of carbon atoms in NdSc<sub>2</sub>N@C<sub>80</sub> (conf **Sc-3**).

| KD | $E \text{ cm}^{-1}$<br>CASSCF | $E \text{ cm}^{-1}$<br>CASSCF (NdSc <sub>2</sub> N <sup>6+</sup> )+PCM | % composition in $ 9/2, m_J\rangle$ basis                                                          | $g_x$  | $g_y$  | $g_z$  |
|----|-------------------------------|------------------------------------------------------------------------|----------------------------------------------------------------------------------------------------|--------|--------|--------|
| 1  | 0                             | 0                                                                      | 100  $\pm 9/2$ $\rangle$                                                                           | 0.0004 | 0.0004 | 6.3330 |
| 2  | 467                           | 417                                                                    | 62  $\pm 7/2$ $\rangle$ + 25  $\pm 3/2$ $\rangle$ + 11  $\pm 5/2$ $\rangle$                        | 0.6263 | 1.9495 | 3.9303 |
| 3  | 648                           | 430                                                                    | 81  $\pm 5/2$ $\rangle$ + 8  $\pm 7/2$ $\rangle$ + 5  $\pm 1/2$ $\rangle$ + 5  $\pm 3/2$ $\rangle$ | 1.0218 | 1.3629 | 3.1031 |
| 4  | 786                           | 505                                                                    | 64  $\pm 3/2$ $\rangle$ + 29  $\pm 7/2$ $\rangle$ + 6  $\pm 1/2$ $\rangle$                         | 1.2357 | 2.0019 | 2.8027 |
| 5  | 968                           | 580                                                                    | 87  $\pm 1/2$ $\rangle$ + 7  $\pm 3/2$ $\rangle$ + 6  $\pm 5/2$ $\rangle$                          | 5.3387 | 1.8260 | 0.6077 |

**Table S5d.** Ligand-field splitting and pseudospin g-tensors of Kramers doublets of Nd<sup>3+4</sup>I<sub>9/2</sub> multiplet in NdSc<sub>2</sub>N@C<sub>80</sub> (conf **Sc-1**) computed with point charge model (PCM) and LoProp charges scaled by 1.08.

| KD | $E, \text{cm}^{-1}$<br>CASSCF | $E \text{ cm}^{-1}$<br>PCM | % composition in $ 9/2, m_J\rangle$ basis            | $g_x$  | $g_y$  | $g_z$  |
|----|-------------------------------|----------------------------|------------------------------------------------------|--------|--------|--------|
| 1  | 0                             | 0                          | 100  $\pm 9/2$ $\rangle$                             | 0.0002 | 0.0002 | 6.5446 |
| 2  | 80                            | 454                        | 99.8  $\pm 7/2$ $\rangle$                            | 0.0142 | 0.0149 | 5.0859 |
| 3  | 435                           | 630                        | 99.5  $\pm 5/2$ $\rangle$                            | 0.0655 | 0.0937 | 3.6244 |
| 4  | 594                           | 757                        | 97.1  $\pm 3/2$ $\rangle$ + 2.6  $\pm 1/2$ $\rangle$ | 1.1010 | 1.1942 | 2.1074 |
| 5  | 693                           | 847                        | 96.9  $\pm 1/2$ $\rangle$ + 2.7  $\pm 3/2$ $\rangle$ | 4.7423 | 2.4437 | 0.6607 |

### CASSCF calculations of Nd(C<sub>5</sub>Me<sub>5</sub>)<sub>3</sub> and Nd(C<sub>5</sub>Me<sub>4</sub>H)<sub>3</sub>

**Table S6a.** Ligand-field splitting and pseudospin g-tensors of Kramers doublets of Nd<sup>3+</sup>-<sup>4</sup>I<sub>9/2</sub> multiplet computed at the CASSCF/RASSI level for Nd(C<sub>5</sub>Me<sub>5</sub>)<sub>3</sub>.

| KD | <i>E</i><br>exp PL | <i>E</i><br>CASSCF | % composition in  9/2, <i>m<sub>J</sub></i> ⟩ basis | <i>g<sub>x</sub></i> | <i>g<sub>y</sub></i> | <i>g<sub>z</sub></i> |
|----|--------------------|--------------------|-----------------------------------------------------|----------------------|----------------------|----------------------|
| 1  | 0                  | 0                  | 76.4 ±5/2⟩ + 23.6 ±7/2⟩                             | 2.1691               | 2.1330               | 1.4712               |
| 2  | 36                 | 29                 | 90.2 ±3/2⟩ + 9.8 ±9/2⟩                              | 0.0134               | 0.0241               | 1.0526               |
| 3  | 202                | 157                | 100.0 ±1/2⟩                                         | 3.6536               | 3.6421               | 0.5476               |
| 4  | 699                | 441                | 90.2 ±9/2⟩ + 9.8 ±3/2⟩                              | 0.0002               | 0.0009               | 5.5844               |
| 5  | 861                | 531                | 76.4 ±7/2⟩ + 23.6 ±5/2⟩                             | 2.3336               | 2.3358               | 3.1396               |

Experimental data are determined by luminescence at room temperature in Ref <sup>15</sup>

**Table S6b.** Ligand-field splitting and pseudospin g-tensors of Kramers doublets of Nd<sup>3+</sup>-<sup>4</sup>I<sub>9/2</sub> multiplet computed at the CASSCF/RASSI level for Nd(C<sub>5</sub>Me<sub>4</sub>H)<sub>3</sub>.

| KD | <i>E</i><br>exp abs | <i>E</i><br>CASSCF | % composition in  9/2, <i>m<sub>J</sub></i> ⟩ basis | <i>g<sub>x</sub></i> | <i>g<sub>y</sub></i> | <i>g<sub>z</sub></i> |
|----|---------------------|--------------------|-----------------------------------------------------|----------------------|----------------------|----------------------|
| 1  | 0                   | 0                  | 74.1 ±5/2⟩ + 25.9 ±7/2⟩                             | 2.2126               | 2.1912               | 1.2232               |
| 2  | 70                  | 40                 | 89.1 ±3/2⟩ + 10.9 ±9/2⟩                             | 0.0085               | 0.0140               | 0.8978               |
| 3  | 265                 | 181                | 100.0 ±1/2⟩                                         | 3.6384               | 3.6313               | 0.5129               |
| 4  | 800                 | 517                | 89.2 ±9/2⟩ + 10.8 ±3/2⟩                             | 0.0002               | 0.0042               | 5.4672               |
| 5  | 1000                | 629                | 74.1 ±7/2⟩ + 25.9 ±5/2⟩                             | 2.4205               | 2.4282               | 2.8993               |

Experimental data are determined by various optical spectroscopic techniques in Ref <sup>16</sup>

Our *ab initio* calculations for Nd(η<sup>5</sup>-C<sub>5</sub>Me<sub>5</sub>)<sub>3</sub> and Nd(η<sup>5</sup>-C<sub>5</sub>Me<sub>4</sub>H)<sub>3</sub> gave the Δ<sub>LF</sub> values of 532 cm<sup>-1</sup> and 629 cm<sup>-1</sup>, respectively (see Table S6), meaning that either CASSCF/RASSI underestimates the LF splitting by as much as 60%, or some of the experimental lines may require re-assignment.

### CASSCF calculations for NdLu<sub>2</sub>N@C<sub>80</sub> and NdY<sub>2</sub>N@C<sub>80</sub>

Based on the results of CASSCF calculations for conformers of NdSc<sub>2</sub>N@C<sub>80</sub>, we chosen two representative conformers of NdM<sub>2</sub>N@C<sub>80</sub> (M = Lu, Y) for *ab initio* calculations, **Lu(Y)-1** and **Lu(Y)-3**. These conformers are different in the way how Nd is coordinated to the fullerene: in **Lu(Y)-1**, coordination is to hexagon nearly of  $\eta^6$  type, while **Lu(Y)-3** features less central position of Nd above pentagon with  $\eta^3$  hapticity (Fig. S19). The difference of LF splitting between these conformers appeared to be less pronounced than in NdSc<sub>2</sub>N@C<sub>80</sub> conformers, presumably because even in the case of  $\eta^6$  coordination, Nd–N axis and  $g_z$  axis of KD1 are in fact oriented not to the center of the hexagon but closer to one of carbon atoms.

In CASSCF calculations of NdLu<sub>2</sub>N@C<sub>80</sub>, the use of full-electron basis for Lu appeared problematic because of the poor convergence. We therefore performed calculations with DFT-optimized structures of NdLu<sub>2</sub>N@C<sub>80</sub> and using Sc or Y instead of Lu in CASSCF calculations. For consistency, analogous calculations were also performed for NdY<sub>2</sub>N@C<sub>80</sub>. Comparison of the results shows that the replacement of Lu with Sc or Y has little effect on the wavefunction composition and only slightly affects pseudospin g-tensors, but has more pronounced influence on the LF splitting. For instance, for conformers **Lu-3** and **Y-3**, the energy of KD2 appeared not sensitive to the use of Sc or Y, while the energies of higher KDs tend to be higher for Y than for Sc by 20–30 cm<sup>-1</sup>. Considering that ionic radius of Lu is between that of Sc and Y, we used mean values when plotting calculated energies for NdLu<sub>2</sub>N@C<sub>80</sub> in Fig. 3.

It is remarkable that in agreement with experimental spectra, the energy of KD2 in NdY<sub>2</sub>N@C<sub>80</sub> in conformer **Y-3** is ca 50 cm<sup>-1</sup> smaller than in the analogous conformer NdLu<sub>2</sub>N@C<sub>80</sub>, while other KDs have similar energies. Calculated results for conformer **Lu(Y)-1** give higher energy of KD2 for Y than for Lu. We therefore preferred to use conformer **Lu(Y)-3** for comparison with experimental data in Fig. 3, as this conformer displays closer resemblance to experimental spectra.

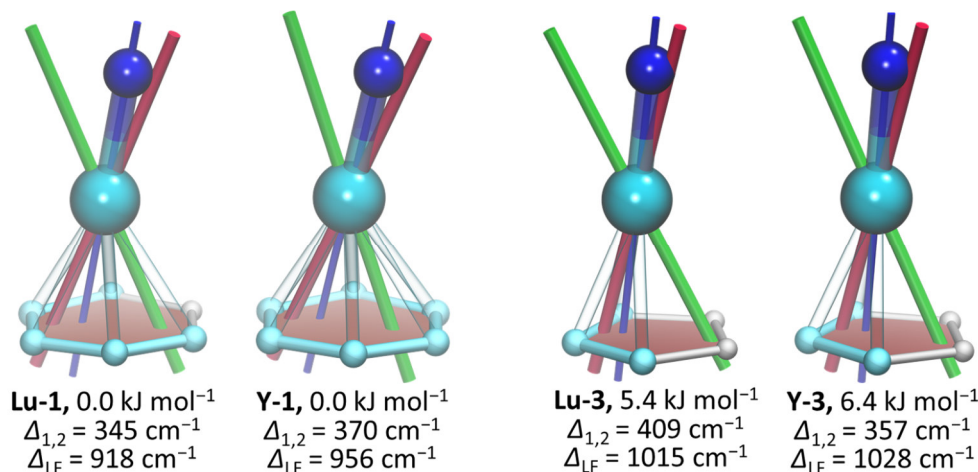

**Figure S19.** Coordination of Nd atom to the closest carbon atoms in two representative conformers of NdLu<sub>2</sub>N@C<sub>80</sub> and NdLu<sub>2</sub>N@C<sub>80</sub>, their geometrical Nd–N axes (thin blue lines) and  $g_z$  axes of the two lowest-energy Kramers doublets from CASSCF calculations (KD1 – red lines, KD2 – green lines). Color code: Nd – cyan, N – blue, C – light cyan ( $d_{Nd-C} \leq 2.6$  Å) or light gray ( $d_{Nd-C} > 2.6$  Å). Nd–C distances shorter than 2.6 Å are shown as bonds. Also listed for each conformer are its relative energy from DFT calculations and  $\Delta_{1,2}$  and  $\Delta_{LF}$  splitting from CASSCF calculations.

**Table S7a.** Ligand-field splitting of  $\text{Nd}^{3+}\text{-}^4\text{I}_{9/2}$  multiplet in  $\text{NdLu}_2\text{N@C}_{80}$  (conf **Lu-1**, Sc instead of Lu) computed at the CASSCF/RASSI level.

| KD | exp. $E$<br>$\text{cm}^{-1}$ | calc. $E$<br>$\text{cm}^{-1}$ | % composition in $ J, m_J\rangle$ basis ( $J = 9/2$ )                           | $g_x$  | $g_y$  | $g_z$  | $\phi^\circ$ |
|----|------------------------------|-------------------------------|---------------------------------------------------------------------------------|--------|--------|--------|--------------|
| 1  | 0                            | 0                             | $86 \pm 9/2\rangle + 11 \pm 5/2\rangle$                                         | 0.0934 | 0.1048 | 5.8192 | 0            |
| 2  | 510                          | 351                           | $41 \pm 7/2\rangle + 29 \pm 5/2\rangle + 23 \pm 3/2\rangle$                     | 0.4743 | 0.7057 | 5.3798 |              |
| 3  | 775                          | 589                           | $36 \pm 3/2\rangle + 35 \pm 5/2\rangle + 20 \pm 1/2\rangle + 6 \pm 9/2\rangle$  | 0.7516 | 1.7961 | 4.2842 |              |
| 4  | 958                          | 779                           | $41 \pm 7/2\rangle + 28 \pm 1/2\rangle + 15 \pm 5/2\rangle + 13 \pm 3/2\rangle$ | 3.4005 | 2.9636 | 0.0423 |              |
| 5  | 1161                         | 909                           | $48 \pm 1/2\rangle + 27 \pm 3/2\rangle + 15 \pm 7/2\rangle + 10 \pm 5/2\rangle$ | 0.6876 | 2.3101 | 4.2050 |              |

total contribution of  $B_q^2$ ,  $B_q^4$ , and  $B_q^6$  terms to LF splitting: 94.8 %; angle between  $g_z$  axis of KD1 and Nd–N bond is  $11.6^\circ$

**Table S7b.** Ligand-field splitting of  $\text{Nd}^{3+}\text{-}^4\text{I}_{9/2}$  multiplet in  $\text{NdLu}_2\text{N@C}_{80}$  (conf **Lu-1**, Y instead of Lu) computed at the CASSCF/RASSI level.

| KD | exp. $E$<br>$\text{cm}^{-1}$ | calc. $E$<br>$\text{cm}^{-1}$ | % composition in $ J, m_J\rangle$ basis ( $J = 9/2$ )                           | $g_x$  | $g_y$  | $g_z$  | $\phi^\circ$ |
|----|------------------------------|-------------------------------|---------------------------------------------------------------------------------|--------|--------|--------|--------------|
| 1  | 0                            | 0                             | $86 \pm 9/2\rangle + 11 \pm 5/2\rangle$                                         | 0.0894 | 0.1021 | 5.8208 | 0            |
| 2  | 510                          | 339                           | $42 \pm 7/2\rangle + 29 \pm 5/2\rangle + 21 \pm 3/2\rangle + 7 \pm 9/2\rangle$  | 0.4374 | 0.6147 | 5.4561 |              |
| 3  | 775                          | 597                           | $37 \pm 3/2\rangle + 33 \pm 5/2\rangle + 23 \pm 1/2\rangle + 5 \pm 9/2\rangle$  | 0.7717 | 2.0060 | 4.2083 |              |
| 4  | 958                          | 800                           | $40 \pm 7/2\rangle + 28 \pm 1/2\rangle + 17 \pm 5/2\rangle + 13 \pm 3/2\rangle$ | 3.5002 | 2.8433 | 0.1167 |              |
| 5  | 1161                         | 927                           | $46 \pm 1/2\rangle + 29 \pm 3/2\rangle + 15 \pm 7/2\rangle + 10 \pm 5/2\rangle$ | 0.7293 | 2.3728 | 4.1255 |              |

total contribution of  $B_q^2$ ,  $B_q^4$ , and  $B_q^6$  terms to LF splitting: 94.5 %; angle between  $g_z$  axis of KD1 and Nd–N bond is  $12.0^\circ$

**Table S7c.** Ligand-field splitting of  $\text{Nd}^{3+}\text{-}^4\text{I}_{9/2}$  multiplet in  $\text{NdY}_2\text{N@C}_{80}$  (conf **Y-1**, Sc instead of Y) computed at the CASSCF/RASSI level.

| KD | exp. $E$<br>$\text{cm}^{-1}$ | calc. $E$<br>$\text{cm}^{-1}$ | % composition in $ J, m_J\rangle$ basis ( $J = 9/2$ )                           | $g_x$  | $g_y$  | $g_z$  | $\phi^\circ$ |
|----|------------------------------|-------------------------------|---------------------------------------------------------------------------------|--------|--------|--------|--------------|
| 1  | 0                            | 0                             | $83 \pm 9/2\rangle + 11 \pm 5/2\rangle$                                         | 0.1072 | 0.1259 | 5.6874 | 0            |
| 2  | 420                          | 372                           | $36 \pm 7/2\rangle + 33 \pm 5/2\rangle + 19 \pm 3/2\rangle + 8 \pm 9/2\rangle$  | 0.4722 | 0.8006 | 5.2289 |              |
| 3  | 711                          | 588                           | $37 \pm 3/2\rangle + 31 \pm 5/2\rangle + 17 \pm 1/2\rangle + 8 \pm 7/2\rangle$  | 0.8623 | 1.8237 | 4.0464 |              |
| 4  | 1005                         | 793                           | $39 \pm 7/2\rangle + 28 \pm 1/2\rangle + 15 \pm 5/2\rangle + 15 \pm 3/2\rangle$ | 3.3334 | 2.8496 | 0.3317 |              |
| 5  | 1188                         | 938                           | $49 \pm 1/2\rangle + 25 \pm 3/2\rangle + 17 \pm 7/2\rangle + 10 \pm 5/2\rangle$ | 0.8706 | 2.5878 | 3.8852 |              |

total contribution of  $B_q^2$ ,  $B_q^4$ , and  $B_q^6$  terms to LF splitting: 94.6 %; angle between  $g_z$  axis of KD1 and Nd–N bond is  $10.6^\circ$

**Table S7d.** Ligand-field splitting of  $\text{Nd}^{3+}\text{-}^4\text{I}_{9/2}$  multiplet in  $\text{NdY}_2\text{N@C}_{80}$  (conf **Y-1**) computed at the CASSCF/RASSI level.

| KD | exp. $E$<br>$\text{cm}^{-1}$ | calc. $E$<br>$\text{cm}^{-1}$ | % composition in $ J, m_J\rangle$ basis ( $J = 9/2$ )                           | $g_x$  | $g_y$  | $g_z$  | $\phi^\circ$ |
|----|------------------------------|-------------------------------|---------------------------------------------------------------------------------|--------|--------|--------|--------------|
| 1  | 0                            | 0                             | $83 \pm 9/2\rangle + 10 \pm 5/2\rangle$                                         | 0.1069 | 0.1251 | 5.6897 | 0            |
| 2  | 420                          | 370                           | $38 \pm 7/2\rangle + 33 \pm 5/2\rangle + 17 \pm 3/2\rangle + 9 \pm 9/2\rangle$  | 0.4333 | 0.7055 | 5.3514 |              |
| 3  | 711                          | 597                           | $36 \pm 3/2\rangle + 30 \pm 5/2\rangle + 20 \pm 1/2\rangle + 8 \pm 7/2\rangle$  | 0.8595 | 2.0443 | 4.0268 |              |
| 4  | 1005                         | 815                           | $37 \pm 7/2\rangle + 27 \pm 1/2\rangle + 17 \pm 5/2\rangle + 17 \pm 3/2\rangle$ | 3.1997 | 2.9042 | 0.4781 |              |
| 5  | 1188                         | 956                           | $47 \pm 1/2\rangle + 26 \pm 3/2\rangle + 16 \pm 7/2\rangle + 10 \pm 5/2\rangle$ | 0.8611 | 2.6187 | 4.8452 |              |

total contribution of  $B_q^2$ ,  $B_q^4$ , and  $B_q^6$  terms to LF splitting: 94.5 %; angle between  $g_z$  axis of KD1 and Nd–N bond is  $10.8^\circ$

**Table S8a.** Ligand-field splitting of  $\text{Nd}^{3+}\text{-}^4\text{I}_{9/2}$  multiplet in  $\text{NdLu}_2\text{N@C}_{80}$  (conf **Lu-3**, Sc instead of Lu) computed at the CASSCF/RASSI level.

| KD | exp. $E$<br>$\text{cm}^{-1}$ | calc. $E$<br>$\text{cm}^{-1}$ | % composition in $ J, m_J\rangle$ basis ( $J = 9/2$ )                           | $g_x$  | $g_y$  | $g_z$  | $\phi^\circ$ |
|----|------------------------------|-------------------------------|---------------------------------------------------------------------------------|--------|--------|--------|--------------|
| 1  | 0                            | 0                             | $85 \pm 9/2\rangle + 10 \pm 5/2\rangle$                                         | 0.0036 | 0.0092 | 5.7520 | 0            |
| 2  | 510                          | 410                           | $48 \pm 7/2\rangle + 24 \pm 3/2\rangle + 23 \pm 5/2\rangle$                     | 0.2008 | 0.5116 | 4.8088 |              |
| 3  | 775                          | 652                           | $35 \pm 5/2\rangle + 28 \pm 1/2\rangle + 25 \pm 3/2\rangle + 9 \pm 9/2\rangle$  | 0.0969 | 1.7825 | 3.9574 |              |
| 4  | 958                          | 882                           | $35 \pm 7/2\rangle + 28 \pm 1/2\rangle + 24 \pm 5/2\rangle + 11 \pm 3/2\rangle$ | 0.4679 | 3.7226 | 2.4160 |              |
| 5  | 1161                         | 1001                          | $40 \pm 1/2\rangle + 39 \pm 3/2\rangle + 13 \pm 7/2\rangle + 9 \pm 5/2\rangle$  | 4.0587 | 2.5187 | 0.7308 |              |

total contribution of  $B_q^2$ ,  $B_q^4$ , and  $B_q^6$  terms to LF splitting: 93.6%; angle between  $g_z$  axis of KD1 and Nd–N bond is  $7.6^\circ$

**Table S8b.** Ligand-field splitting of  $\text{Nd}^{3+}\text{-}^4\text{I}_{9/2}$  multiplet in  $\text{NdLu}_2\text{N@C}_{80}$  (conf **Lu-3**, Y instead of Lu) computed at the CASSCF/RASSI level.

| KD | exp. $E$<br>$\text{cm}^{-1}$ | calc. $E$<br>$\text{cm}^{-1}$ | % composition in $ J, m_J\rangle$ basis ( $J = 9/2$ )                           | $g_x$  | $g_y$  | $g_z$  | $\phi^\circ$ |
|----|------------------------------|-------------------------------|---------------------------------------------------------------------------------|--------|--------|--------|--------------|
| 1  | 0                            | 0                             | $84 \pm 9/2\rangle + 10 \pm 5/2\rangle$                                         | 0.0042 | 0.0081 | 5.7171 | 0            |
| 2  | 510                          | 409                           | $49 \pm 7/2\rangle + 22 \pm 5/2\rangle + 21 \pm 3/2\rangle$                     | 0.1517 | 0.4547 | 4.9043 |              |
| 3  | 775                          | 673                           | $32 \pm 5/2\rangle + 29 \pm 1/2\rangle + 25 \pm 3/2\rangle + 9 \pm 9/2\rangle$  | 0.2695 | 2.0131 | 3.8157 |              |
| 4  | 958                          | 905                           | $33 \pm 7/2\rangle + 28 \pm 1/2\rangle + 26 \pm 5/2\rangle + 11 \pm 3/2\rangle$ | 0.6272 | 3.6636 | 2.4075 |              |
| 5  | 1161                         | 1029                          | $40 \pm 3/2\rangle + 37 \pm 1/2\rangle + 13 \pm 7/2\rangle + 9 \pm 5/2\rangle$  | 3.9209 | 2.6344 | 0.7860 |              |

total contribution of  $B_q^2$ ,  $B_q^4$ , and  $B_q^6$  terms to LF splitting: 94.0 %; angle between  $g_z$  axis of KD1 and Nd–N bond is  $7.7^\circ$

**Table S8c.** Ligand-field splitting of  $\text{Nd}^{3+}\text{-}^4\text{I}_{9/2}$  multiplet in  $\text{NdY}_2\text{N@C}_{80}$  (conf **Y-3**, Sc instead of Y) computed at the CASSCF/RASSI level.

| KD | exp. $E$<br>$\text{cm}^{-1}$ | calc. $E$<br>$\text{cm}^{-1}$ | % composition in $ J, m_J\rangle$ basis ( $J = 9/2$ )                          | $g_x$  | $g_y$  | $g_z$  | $\phi^\circ$ |
|----|------------------------------|-------------------------------|--------------------------------------------------------------------------------|--------|--------|--------|--------------|
| 1  | 0                            | 0                             | $84 \pm 9/2\rangle + 11 \pm 5/2\rangle$                                        | 0.0016 | 0.0190 | 5.7031 | 0            |
| 2  | 420                          | 362                           | $49 \pm 7/2\rangle + 24 \pm 3/2\rangle + 22 \pm 5/2\rangle$                    | 0.1614 | 0.4136 | 4.8780 |              |
| 3  | 711                          | 637                           | $32 \pm 1/2\rangle + 31 \pm 5/2\rangle + 26 \pm 3/2\rangle + 9 \pm 9/2\rangle$ | 0.2653 | 2.1164 | 3.7799 |              |
| 4  | 1005                         | 875                           | $34 \pm 7/2\rangle + 30 \pm 1/2\rangle + 28 \pm 5/2\rangle + 7 \pm 3/2\rangle$ | 0.7862 | 3.6437 | 2.2903 |              |
| 5  | 1188                         | 996                           | $43 \pm 3/2\rangle + 33 \pm 1/2\rangle + 15 \pm 7/2\rangle + 9 \pm 5/2\rangle$ | 3.8398 | 2.5396 | 0.9997 |              |

total contribution of  $B_q^2$ ,  $B_q^4$ , and  $B_q^6$  terms to LF splitting: 92.8%; angle between  $g_z$  axis of KD1 and Nd–N bond is  $9.5^\circ$

**Table S8d.** Ligand-field splitting of  $\text{Nd}^{3+}\text{-}^4\text{I}_{9/2}$  multiplet in  $\text{NdY}_2\text{N@C}_{80}$  (conf **Y-3**) computed at the CASSCF/RASSI level.

| KD | exp. $E$<br>$\text{cm}^{-1}$ | calc. $E$<br>$\text{cm}^{-1}$ | % composition in $ J, m_J\rangle$ basis ( $J = 9/2$ )                          | $g_x$  | $g_y$  | $g_z$  | $\phi^\circ$ |
|----|------------------------------|-------------------------------|--------------------------------------------------------------------------------|--------|--------|--------|--------------|
| 1  | 0                            | 0                             | $82 \pm 9/2\rangle + 12 \pm 5/2\rangle$                                        | 0.0001 | 0.0193 | 5.6649 | 0            |
| 2  | 420                          | 357                           | $49 \pm 7/2\rangle + 23 \pm 3/2\rangle + 22 \pm 5/2\rangle + 6 \pm 9/2\rangle$ | 0.1232 | 0.3599 | 4.9815 |              |
| 3  | 711                          | 657                           | $34 \pm 1/2\rangle + 29 \pm 5/2\rangle + 26 \pm 3/2\rangle + 9 \pm 9/2\rangle$ | 0.4064 | 2.3265 | 3.6440 |              |
| 4  | 1005                         | 901                           | $33 \pm 7/2\rangle + 31 \pm 1/2\rangle + 29 \pm 5/2\rangle + 7 \pm 3/2\rangle$ | 0.9266 | 3.5722 | 2.2766 |              |
| 5  | 1188                         | 1028                          | $44 \pm 3/2\rangle + 31 \pm 1/2\rangle + 16 \pm 7/2\rangle + 9 \pm 5/2\rangle$ | 3.7235 | 2.5832 | 1.0728 |              |

total contribution of  $B_q^2$ ,  $B_q^4$ , and  $B_q^6$  terms to LF splitting: 92.6%; angle between  $g_z$  axis of KD1 and Nd–N bond is  $9.8^\circ$

**Table S9.** Ligand-field splitting ( $\Delta_{LF}$ ) of  $Nd^{3+}$   $^4I_{9/2}$  and  $^4F_{3/2}$  multiplets, their energy difference ( $\Delta E_{aver}$ ), and the ratio of the energy difference to that in the free ion ( $\beta_{spec} = \Delta E_{aver}/\Delta E_{free\ ion}$ ).<sup>a</sup>

| compound <sup>b</sup>                                                                                                                          | $\Delta_{LF}(^4I_{9/2})$ | $\Delta_{LF}(^4F_{3/2})$ | $\Delta E_{aver}(^4F_{3/2}-^4I_{9/2})^c$ | $\beta_{spec}$ | Ref. |
|------------------------------------------------------------------------------------------------------------------------------------------------|--------------------------|--------------------------|------------------------------------------|----------------|------|
| <b>Nd<sup>3+</sup> free ion</b>                                                                                                                | –                        | –                        | 11699                                    | 1.000          | 14   |
| <b>Nd-EMFs:</b>                                                                                                                                |                          |                          |                                          |                |      |
| NdLu <sub>2</sub> N@C <sub>80</sub>                                                                                                            | 1161                     | 440                      | 10445                                    | 0.893          | t.w. |
| NdY <sub>2</sub> N@C <sub>80</sub>                                                                                                             | 1188                     | 440                      | 10456                                    | 0.894          | t.w. |
| NdSc <sub>2</sub> N@C <sub>80</sub>                                                                                                            | 1061                     | 410                      | 10558                                    | 0.903          | t.w. |
| <b>Nd(CpX)<sub>3</sub>:</b>                                                                                                                    |                          |                          |                                          |                |      |
| Nd( $\eta^5$ -C <sub>5</sub> Me <sub>4</sub> H) <sub>3</sub>                                                                                   | 1000                     | 710                      | 10925                                    | 0.934          | 16   |
| Nd( $\eta^5$ -C <sub>5</sub> Me <sub>5</sub> ) <sub>3</sub>                                                                                    | 861                      | 635                      | 10928                                    | 0.934          | 15   |
| Nd( $\eta^5$ -C <sub>5</sub> H <sub>4</sub> <sup>t</sup> Bu) <sub>3</sub>                                                                      | 1029                     | 684                      | 10951                                    | 0.936          | 17   |
| Nd( $\eta^5$ -C <sub>5</sub> H <sub>4</sub> SiMe <sub>3</sub> ) <sub>3</sub>                                                                   | 1031                     | 696                      | 10951                                    | 0.936          | 17   |
| <b>Nd-SMMs:</b>                                                                                                                                |                          |                          |                                          |                |      |
| [Nd <sub>2</sub> (2-FBz) <sub>4</sub> (NO <sub>3</sub> ) <sub>2</sub> (phen) <sub>2</sub> ]                                                    | –                        | –                        | 11086                                    | 0.948          | 18   |
| [Nd <sub>2</sub> ( $\mu_2$ -9-AC) <sub>4</sub> (9-AC) <sub>2</sub> (bipy) <sub>2</sub> ]                                                       | 414                      | –                        | 11183                                    | 0.956          | 19   |
| [Nd <sub>2</sub> ( $\mu_2$ -9-AC) <sub>4</sub> (9-AC) <sub>2</sub> (phen) <sub>2</sub> ]                                                       | 415                      | –                        | 11190                                    | 0.956          | 20   |
| [Nd(ntfa) <sub>3</sub> (5,5'-Me <sub>2</sub> bipy)]                                                                                            | –                        | –                        | 11198                                    | 0.957          | 21   |
| [Nd(TTA) <sub>3</sub> (MeOH) <sub>2</sub> ].0.5Azo-py                                                                                          | –                        | 314                      | 11207                                    | 0.958          | 22   |
| Nd(pzdo)[Co <sup>III</sup> (CN) <sub>6</sub> ] <sup>3-</sup>                                                                                   | –                        | –                        | 11211                                    | 0.958          | 23   |
| [Nd(ntfa) <sub>3</sub> (phen)]                                                                                                                 | –                        | –                        | 11236                                    | 0.960          | 21   |
| [Nd(ntfa) <sub>3</sub> (bipy)]                                                                                                                 | –                        | –                        | 11236                                    | 0.960          | 21   |
| [Nd(ntfa) <sub>3</sub> (4,4'-Mt <sub>2</sub> bipy)]                                                                                            | –                        | –                        | 11236                                    | 0.960          | 21   |
| {[Nd <sub>4</sub> (H <sub>2</sub> O) <sub>17</sub> (pzdo) <sub>5</sub> ][Mo <sup>IV</sup> (CN) <sub>8</sub> ] <sub>3</sub> }.9H <sub>2</sub> O | –                        | –                        | 11236                                    | 0.960          | 24   |
| Nd-arsenotungstate POM                                                                                                                         | –                        | –                        | 11249                                    | 0.962          | 25   |
| Nd(Tp) <sub>3</sub>                                                                                                                            | 358                      | 110                      | 11274                                    | 0.964          | 26   |
| {[Nd <sub>4</sub> (H <sub>2</sub> O) <sub>17</sub> (pzdo) <sub>5</sub> ][W <sup>IV</sup> (CN) <sub>8</sub> ] <sub>3</sub> }.9H <sub>2</sub> O  | –                        | –                        | 11287                                    | 0.965          | 24   |
| [Na <sub>2</sub> NdL' <sub>4</sub> (OTf)DMF]                                                                                                   | 425                      | 95                       | 11304                                    | 0.966          | 27   |
| [Zn( $\mu$ -L)( $\mu$ -OAc)Nd(NO <sub>3</sub> ) <sub>2</sub> ].CH <sub>3</sub> CN                                                              | 459                      | –                        | 11343                                    | 0.970          | 28   |
| [Nd <sub>2</sub> ( $\mu$ -2-FBz) <sub>2</sub> (2-FBz) <sub>4</sub> (terpy) <sub>2</sub> ]                                                      | –                        | –                        | 11390                                    | 0.974          | 29   |
| NdMurexAnhy                                                                                                                                    | –                        | –                        | 11494                                    | 0.982          | 30   |
| <b>Nd<sup>3+</sup> in garnets and salts:</b>                                                                                                   |                          |                          |                                          |                |      |
| Nd:Y <sub>2</sub> O <sub>3</sub>                                                                                                               | 645                      | 196                      | 11028                                    | 0.943          | 31   |
| Nd <sub>2</sub> S <sub>3</sub>                                                                                                                 | 385                      | 38                       | 11053                                    | 0.945          | 32   |
| Nd:Y <sub>3</sub> Al <sub>2</sub> (AlO <sub>4</sub> ) <sub>3</sub> [YAG]                                                                       | 848                      | 92                       | 11167                                    | 0.955          | 33   |
| Nd:Y <sub>3</sub> Sc <sub>2</sub> (AlO <sub>4</sub> ) <sub>3</sub> [YSAG]                                                                      | 823                      | 100                      | 11189                                    | 0.956          | 34   |
| Nd:Gd <sub>3</sub> Sc <sub>2</sub> (GaO <sub>4</sub> ) <sub>3</sub> [GSGG]                                                                     | 763                      | 62                       | 11203                                    | 0.958          | 34   |
| Nd:La <sub>3</sub> Lu <sub>2</sub> (GaO <sub>4</sub> ) <sub>3</sub> [LLGG]                                                                     | 710                      | 122                      | 11221                                    | 0.959          | 34   |
| Nd:LaCl <sub>3</sub>                                                                                                                           | 249                      | 30                       | 11293                                    | 0.965          | 35   |
| [Nd(H <sub>2</sub> O) <sub>9</sub> ](C <sub>2</sub> H <sub>5</sub> SO <sub>4</sub> ) <sub>3</sub>                                              | 311                      | 15                       | 11367                                    | 0.972          | 36   |
| Nd:LaF <sub>3</sub>                                                                                                                            | 500                      | 42                       | 11418                                    | 0.976          | 37   |

<sup>a</sup>  $\Delta_{LF}$  and  $\Delta E_{aver}(^4F_{3/2}-^4I_{9/2})$  values are determined by optical spectroscopy and given in cm<sup>-1</sup>;

<sup>b</sup> 2-FBz = 2-fluorobenzoate; phen = 1,10-phenanthroline; 9-AC = 9-anthracenecarboxylate; bipy = 2,2'-bipyridine; ntfa = 4,4,4-trifluoro-1-(naphthalen-2-yl)butane-1,3-dionate; 5,5'-Me<sub>2</sub>bipy = 5,5'-dimethyl-2,2'-dipyridine; TTA = trifluoro-1-(2-thienyl)-1,3-butanedione; Azo-py = 4,4'-azopyridine; 4,4'-Mt<sub>2</sub>bipy = 4,4'-dimethoxy-2,2'-dipyridine; pzdo = pyrazine-N,N'-dioxide; Nd-arsenotungstate POM = K<sub>14</sub>Na<sub>6</sub>H<sub>4</sub>[(As<sub>2</sub>W<sub>19</sub>O<sub>67</sub>(H<sub>2</sub>O))Nd(H<sub>2</sub>O)<sub>2</sub>]<sub>2</sub>(C<sub>2</sub>O<sub>4</sub>)]·64H<sub>2</sub>O polyoxometalate; Tp = hydrotris(1-pyrazolyl)borato; L = N,N'-dimethyl-N,N'-bis(2-hydroxy-3-formyl-5-bromo-benzyl)ethylenediamine; L' = N-(diphenylphosphoryl)pyrazine-2-carboxamide; terpy = 2,2':6',2''-terpyridine; Murex = murexide or 2,6-dioxo-5-[(2,4,6-trioxo-5-hexahydropyrimidin-2-ylidene)amino]-3H-pyrimidin-4-olate; Anhy = anhydrous form;

<sup>c</sup>  $\Delta E_{aver}(^4F_{3/2}-^4I_{9/2})$  is calculated using barycenters when LF splitting is available for  $^4I_{9/2}$  and  $^4F_{3/2}$  multiplets; else, when the LF splitting is not resolved,  $\Delta E_{aver}(^4F_{3/2}-^4I_{9/2})$  is calculated using position of the  $^4F_{3/2} \rightarrow ^4I_{9/2}$  PL band.

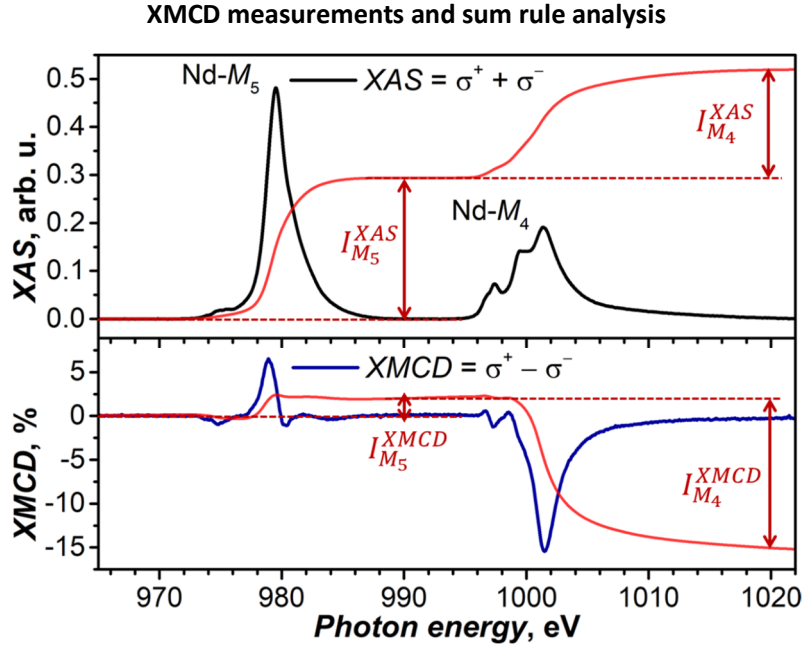

**Figure S20.** XAS (upper panel) and XMCD (lower panel) spectra of NdSc<sub>2</sub>N@C<sub>80</sub> at the Nd- $M_{4,5}$  edges (3d→4f),  $T \approx 5.5$  K,  $\mu_0 H = 6$  T. Left-hand and right-hand polarized XAS spectra are denoted as  $\sigma^+$  and  $\sigma^-$ , non-polarized XAS spectrum is their sum, while XMCD (in %) is their difference normalized to the maximum of XAS. Red lines are integrated XAS and XMCD curves, also shown is the definition of integrals ( $I_{M_{4,5}}^{XAS}$  and  $I_{M_{4,5}}^{XMCD}$ ) used in the sum rule analysis, see Eq. S1

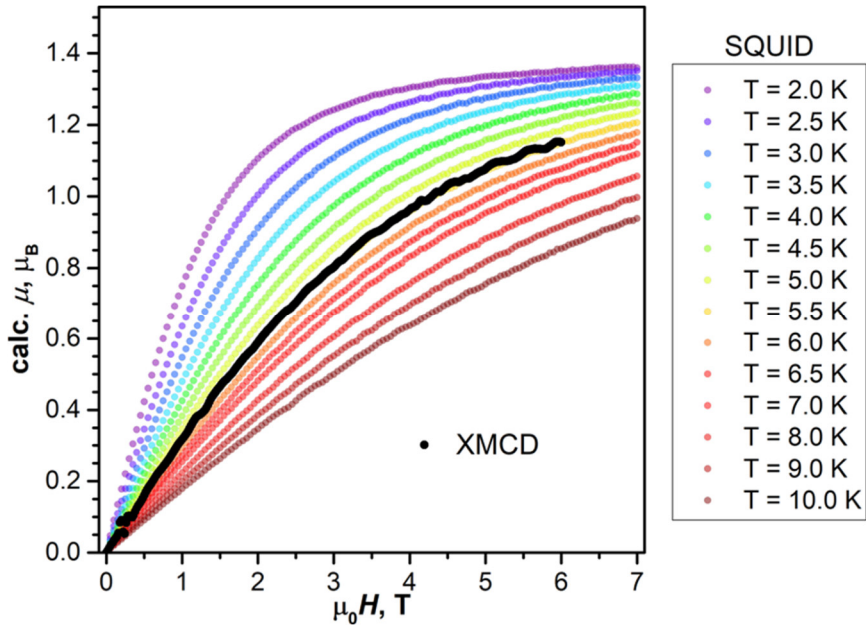

**Figure S21.** Magnetization curve of NdSc<sub>2</sub>N@C<sub>80</sub> measured by XMCD (black dots, arbitrary units) overlaid over magnetization curves measured by SQUID magnetometry (colored dots). The best match between the shapes of XMCD and SQUID curves is obtained for  $T = 5.5$  K. We thus assume that the sample temperature during XMCD measurements was  $T \approx 5.5 \pm 0.5$  K.

In the unpolarized X-ray absorption spectrum at the Nd-M<sub>4,5</sub> absorption edges (3d→4f excitations), NdSc<sub>2</sub>N@C<sub>80</sub> shows typical XAS features of Nd(III) (Fig. S20). When a magnetic field is applied, circular polarized XAS develops a dichroism proportional to the sample magnetization in the direction of the beam (which was kept parallel to the field in our measurements) (Fig. S20). The maximum of the XMCD signal at 1001.5 eV was used to follow magnetization of NdSc<sub>2</sub>N@C<sub>80</sub> during magnetic field ramps from +6 T to −6 T and from −6 T to +6 T with the sweep rate of 2 T/min. No magnetic hysteresis was observed. The obtained magnetization curve averaged over four segments ([−6→0], [0→6], [6→0], and [0→−6] T) is shown in Figure S21. The shape of the curve indicates that the sample magnetization was not saturated at 6 T. Precise temperature estimation on the sample was done by comparison of the magnetization curve measured by XMCD to the curves measured with SQUID magnetometry with the step of 0.5 K. The best match of the curves was obtained for 5.5 K. Thus, we assume that during XMCD measurements the sample had a temperature of  $T \approx 5.5 \pm 0.5$  K.

Magnetic moment along direction of the beam,  $\mu_z$ , can be calculated as  $\mu_z = (\langle \hat{L}_z \rangle + 2\langle \hat{S}_z \rangle) \mu_B / \hbar$ , where  $\langle \hat{L}_z \rangle$  and  $\langle \hat{S}_z \rangle$  are expectation values of angular and spin momentum operators. These values can be estimated from XAS and XMCD spectra using sum rules:<sup>38, 39</sup>

$$\langle \hat{L}_z \rangle = 3(14 - n_{4f}) \frac{I_{M_5}^{XMCD} + I_{M_4}^{XMCD}}{3/2(I_{M_5}^{XAS} + I_{M_4}^{XAS})} \quad (\text{Eq. S1a})$$

$$\langle \hat{S}_z \rangle + 3\langle \hat{T}_z \rangle = 3/2(14 - n_{4f}) \frac{I_{M_5}^{XMCD} - 3/2 I_{M_4}^{XMCD}}{3/2(I_{M_5}^{XAS} + I_{M_4}^{XAS})} \frac{1}{C_{\text{corr}}^{\text{Ln}}} \quad (\text{Eq. S1b})$$

Where  $n_{4f}$  is the number of 4f electrons (3 for Nd), integrals such as  $I_{M_5}^{XAS}$  are defined in Figure S20,  $\langle \hat{T}_z \rangle$  stands for the expectation values of the magnetic dipole operator  $\hat{T}_z$ , and  $C_{\text{corr}}^{\text{Ln}}$  is the correction factor from Ref.<sup>40</sup>, which takes into account the deviation of the sum rules for spin momentum caused by partial mixing of 3d<sub>3/2</sub> and 3d<sub>5/2</sub> multiplets (for Nd<sup>3+</sup>, the value is 2.076).  $\langle \hat{S}_z \rangle$  can be determined from Eq. S1b using the relation  $\langle \hat{T}_z \rangle / \langle \hat{S}_z \rangle = 0.315$  for Nd<sup>3+</sup> tabulated in Ref.<sup>40</sup>.

Using Eq. S1a and S1b, we obtained expectation values of angular and spin momentum operators,  $\langle \hat{L}_z \rangle = 2.02 \mu_B$  and  $\langle \hat{S}_z \rangle = -0.45 \mu_B$ , and the magnetic moment along the beam direction,  $\mu_z = 1.11 \mu_B$ . The uncertainty in determined  $\mu_z$  is mainly caused by ambiguities in integration limits for Nd-M<sub>4</sub> edge and is estimated to be less than  $\pm 0.1 \mu_B$ . The obtained ratio  $\langle \hat{S}_z \rangle / \langle \hat{L}_z \rangle = -0.22$  is close to −0.25, a theoretical expectation for the f<sup>3</sup> system.

### Magnetization relaxation times of NdSc<sub>2</sub>N@C<sub>80</sub>

In AC magnetometry studies, the in-phase and out-of-phase susceptibility,  $\chi'(\nu)$  and  $\chi''(\nu)$ , were measured as a function of oscillation frequency  $\nu$  and then fitted with the generalized Debye model:

$$\chi'(\nu) = \chi_S + (\chi_T - \chi_S) \frac{1 + (\nu\tau_M)^{1-\alpha} \sin\left(\frac{\pi\alpha}{2}\right)}{1 + 2(\nu\tau_M)^{1-\alpha} \sin\left(\frac{\pi\alpha}{2}\right) + (\nu\tau_M)^{2-2\alpha}}$$

$$\chi''(\nu) = (\chi_T - \chi_S) \frac{(\nu\tau_M)^{1-\alpha} \cos\left(\frac{\pi\alpha}{2}\right)}{1 + 2(\nu\tau_M)^{1-\alpha} \sin\left(\frac{\pi\alpha}{2}\right) + (\nu\tau_M)^{2-2\alpha}} + b\nu$$

The linear term ( $b\nu$ ) is included to correct for a linear background that was found in  $\chi''(\nu)$  measurements at high frequency (the background has noticeable contribution to  $\chi''$  curves only above  $> 100$  Hz). Relaxation times  $\tau_M$  and parameters  $\alpha$  determined from the fits are listed in Tables S10-S11. Fitted curves along with the measured points are shown in Fig. S22 and Fig. 8 in the main text.

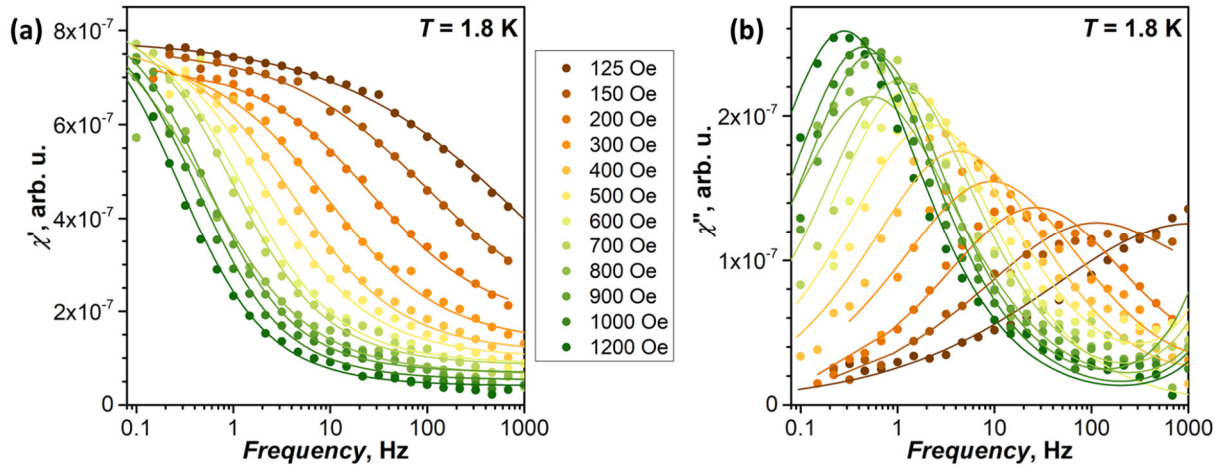

**Figure S22.** AC magnetometry measurements of in-phase  $\chi'$  (a) and out-of-phase  $\chi''$  (b) magnetic susceptibility of NdSc<sub>2</sub>N@C<sub>80</sub> in different magnetic fields at constant temperature of 1.8 K; dots are experimental data, lines are fits with generalized Debye model, from which relaxation times are extracted.

**Table S10.** Magnetization relaxation times of NdSc<sub>2</sub>N@C<sub>80</sub> and  $\alpha$  parameters determined by AC magnetometry at different fields

| $H$ , Oe | $T = 1.8$ K |               |          |             |
|----------|-------------|---------------|----------|-------------|
|          | $\tau$ , s  | $\pm\tau$ , s | $\alpha$ | $\pm\alpha$ |
| 125      | 1.53E-4     | 6.4E-5        | 0.60     | 0.02        |
| 150      | 1.53E-3     | 2.6E-4        | 0.51     | 0.02        |
| 200      | 6.02E-3     | 3.1E-4        | 0.42     | 0.01        |
| 300      | 1.71E-2     | 1.4E-3        | 0.41     | 0.03        |
| 400      | 3.78E-2     | 2.7E-3        | 0.39     | 0.02        |
| 500      | 7.21E-2     | 6.3E-3        | 0.37     | 0.03        |
| 600      | 1.24E-1     | 8.2E-3        | 0.33     | 0.02        |
| 700      | 1.56E-1     | 1.1E-2        | 0.33     | 0.02        |
| 800      | 2.93E-1     | 1.4E-2        | 0.37     | 0.01        |
| 900      | 2.85E-1     | 1.6E-2        | 0.30     | 0.02        |
| 1000     | 3.59E-1     | 2.6E-2        | 0.30     | 0.02        |
| 1200     | 5.61E-1     | 4.3E-2        | 0.31     | 0.02        |

**Table S11.** Magnetization relaxation times of NdSc<sub>2</sub>N@C<sub>80</sub> and  $\alpha$  parameters determined by AC magnetometry at different temperatures

| $T$ , K | $\mu_0 H = 0.2$ T |               |          |             | $\mu_0 H = 0.04$ T |               |          |             | $\mu_0 H = 0.02$ T |               |          |             |
|---------|-------------------|---------------|----------|-------------|--------------------|---------------|----------|-------------|--------------------|---------------|----------|-------------|
|         | $\tau$ , s        | $\pm\tau$ , s | $\alpha$ | $\pm\alpha$ | $\tau$ , s         | $\pm\tau$ , s | $\alpha$ | $\pm\alpha$ | $\tau$ , s         | $\pm\tau$ , s | $\alpha$ | $\pm\alpha$ |
| 1.80    |                   |               |          |             | 3.8E-2             | 2.7E-3        | 0.39     | 0.02        | 6.0E-3             | 3.1E-4        | 0.42     | 0.01        |
| 1.90    | 7.7E-1            | 6.2E-2        | 0.25     | 0.02        | 3.1E-2             | 1.4E-3        | 0.37     | 0.01        | 3.2E-3             | 1.8E-4        | 0.45     | 0.01        |
| 2.00    | 5.6E-1            | 3.4E-2        | 0.24     | 0.02        | 2.8E-2             | 1.3E-3        | 0.34     | 0.02        | 3.5E-3             | 2.0E-4        | 0.42     | 0.01        |
| 2.27    | 2.3E-1            | 1.1E-2        | 0.21     | 0.02        | 2.1E-2             | 8.5E-4        | 0.32     | 0.02        | 3.8E-3             | 1.3E-4        | 0.37     | 0.01        |
| 2.50    | 1.2E-1            | 3.5E-3        | 0.20     | 0.01        | 1.5E-2             | 6.6E-4        | 0.32     | 0.02        | 2.1E-3             | 1.8E-4        | 0.41     | 0.02        |
| 2.73    | 6.3E-2            | 1.5E-3        | 0.19     | 0.01        | 1.2E-2             | 3.7E-4        | 0.25     | 0.01        | 2.9E-3             | 9.9E-5        | 0.33     | 0.01        |
| 3.00    | 3.5E-2            | 7.0E-4        | 0.21     | 0.01        | 8.3E-3             | 2.5E-4        | 0.24     | 0.01        | 1.8E-3             | 1.1E-4        | 0.35     | 0.01        |
| 3.45    | 1.2E-2            | 3.0E-4        | 0.18     | 0.01        | 4.9E-3             | 1.5E-4        | 0.19     | 0.01        | 1.9E-3             | 7.9E-5        | 0.22     | 0.01        |
| 4.00    | 4.7E-3            | 1.0E-4        | 0.15     | 0.01        | 2.4E-3             | 6.0E-5        | 0.14     | 0.01        | 9.6E-4             | 7.3E-5        | 0.19     | 0.02        |
| 4.56    | 1.9E-3            | 4.9E-5        | 0.13     | 0.01        | 1.2E-3             | 3.2E-5        | 0.12     | 0.01        | 6.7E-4             | 3.3E-5        | 0.18     | 0.02        |
| 4.80    | 1.4E-3            | 4.6E-5        | 0.12     | 0.01        |                    |               |          |             |                    |               |          |             |
| 5.00    | 1.1E-3            | 4.0E-5        | 0.08     | 0.02        | 7.4E-4             | 4.2E-5        | 0.10     | 0.02        | 3.0E-4             | 2.3E-5        | 0.17     | 0.02        |
| 5.10    | 9.8E-4            | 3.4E-5        | 0.07     | 0.01        |                    |               |          |             |                    |               |          |             |
| 6.00    | 4.0E-4            | 4.9E-5        | 0.01     | 0.04        | 2.3E-4             | 1.2E-5        | 0.05     | 0.02        | 2.0E-4             | 2.5E-5        | 0.03     | 0.04        |
| 6.00    | 3.3E-4            | 2.9E-5        | 0.05     | 0.02        |                    |               |          |             |                    |               |          |             |
| 7.00    | 2.0E-4            | 3.0E-5        | 0.00     | 0.05        | 1.4E-4             | 2.6E-5        | 0.00     | 0.04        |                    |               |          |             |

Coexistence of tunneling and thermal relaxation processes results in rather large values of the  $\alpha$  parameter, which tend to decrease with the increase of the external field because of the gradual suppression of the QTM mechanism.

## References

1. Mueller, U.; Förster, R.; Hellmig, M.; Huschmann, F. U.; Kastner, A.; Malecki, P.; Pühringer, S.; Röwer, M.; Sparta, K.; Steffien, M.; Ühlein, M.; Wilk, P.; Weiss, M. S., The macromolecular crystallography beamlines at BESSY II of the Helmholtz-Zentrum Berlin: Current status and perspectives. *Eur. Phys. J. Plus* **2015**, *130* (7), 141.
2. Kabsch, W., XDS. *Acta Cryst. D* **2010**, *66* (2), 125-132.
3. Sparta, K. M.; Krug, M.; Heinemann, U.; Mueller, U.; Weiss, M. S., XDSAPP2.0. *J. Appl. Crystallogr.* **2016**, *49* (3), 1085-1092.
4. Sheldrick, G., Crystal structure refinement with SHELXL. *Acta Cryst. C* **2015**, *71* (1), 3-8.
5. Hafner, J., Ab-initio simulations of materials using VASP: Density-functional theory and beyond. *J. Comput. Chem.* **2008**, *29* (13), 2044-2078.
6. Kresse, G.; Hafner, J., Ab initio molecular dynamics for liquid metals. *Phys. Rev. B* **1993**, *47* (1), 558-561.
7. Kresse, G.; Joubert, D., From ultrasoft pseudopotentials to the projector augmented-wave method. *Phys. Rev. B* **1999**, *59* (3), 1758-1775.
8. Perdew, J. P.; Burke, K.; Ernzerhof, M., Generalized gradient approximation made simple. *Phys. Rev. Lett.* **1996**, *77* (18), 3865-3868.
9. Grimme, S., Density functional theory with London dispersion corrections. *WIREs Comput. Mol. Sci.* **2011**, *1* (2), 211-228.
10. Aquilante, F.; Autschbach, J.; Baiardi, A.; Battaglia, S.; Borin, V. A.; Chibotaru, L. F.; Conti, I.; Vico, L. D.; Delcey, M.; Galván, I. F.; Ferré, N.; Freitag, L.; Garavelli, M.; Gong, X.; Knecht, S.; Larsson, E. D.; Lindh, R.; Lundberg, M.; Malmqvist, P. Å.; Nenov, A.; Norell, J.; Odelius, M.; Olivucci, M.; Pedersen, T. B.; Pedraza-González, L.; Phung, Q. M.; Pierloot, K.; Reiher, M.; Schapiro, I.; Segarra-Martí, J.; Segatta, F.; Seijo, L.; Sen, S.; Sergentu, D.-C.; Stein, C. J.; Ungur, L.; Vacher, M.; Valentini, A.; Veryazov, V., Modern quantum chemistry with [Open]Molcas. *J. Chem. Phys.* **2020**, *152* (21), 214117.
11. Chibotaru, L. F.; Ungur, L., Ab initio calculation of anisotropic magnetic properties of complexes. I. Unique definition of pseudospin Hamiltonians and their derivation. *J. Chem. Phys.* **2012**, *137* (6), 064112.
12. Chilton, N. F.; Anderson, R. P.; Turner, L. D.; Soncini, A.; Murray, K. S., PHI: A powerful new program for the analysis of anisotropic monomeric and exchange-coupled polynuclear d- and f-block complexes. *J. Comput. Chem.* **2013**, *34* (13), 1164-1175.
13. Barla, A.; Nicolás, J.; Cocco, D.; Valvidares, S. M.; Herrero-Martín, J.; Gargiani, P.; Moldes, J.; Ruget, C.; Pellegrin, E.; Ferrer, S., Design and performance of BOREAS, the beamline for resonant X-ray absorption and scattering experiments at the ALBA synchrotron light source. *J. Synchrotr. Radiat.* **2016**, *23* (6), 1507-1517.
14. Wyart, J.-F.; Meftah, A.; Bachelier, A.; Sinzelle, J.; Tchang-Brillet, W.-Ü. L.; Champion, N.; Spector, N.; Sugar, J., Energy levels of  $4f^3$  in the  $Nd^{3+}$  free ion from emission spectra. *J. Phys. B: At. Mol. Opt. Phys* **2006**, *39* (5), L77-L82.
15. Amberger, H.-D.; Reddmann, H.; Mueller, T. J.; Evans, W. J., Electronic structures of organometallic complexes of f elements LXXV: Parametric analysis of the crystal field splitting pattern of  $Nd(\eta^5-C_5Me_5)_3$ . *J. Organomet. Chem.* **2011**, *696* (15), 2829-2836.
16. Amberger, H.-D.; Reddmann, H., Zur Elektronenstruktur metallorganischer Komplexe der f-Elemente. 65 Erstmalige Beobachtung des linearen Dichroismus bei einem homoleptischen metallorganischen  $\pi$ -Komplex der f-Elemente:  $Tris(\eta^5\text{-tetramethylcyclopenta-dienyl})neodym(III)$ . *Z. Anorg. Allg. Chem.* **2007**, *633* (3), 443-452.
17. Jank, S.; Reddmann, H.; Amberger, H.-D.; Apostolidis, C., Zur Elektronenstruktur metallorganischer Komplexe der f-Elemente LIX. Spektrochemische und nephelauxetische Effekte sowie experimentorientierte MO-Schemata (im f-Bereich) pseudo-trigonal-planarer (substituierter)  $Tris(\eta^5\text{-$

- cyclopentadienyl)neodymium(III)-Komplexe und eines THF-Monoaddukts. *J. Organomet. Chem.* **2004**, *689* (20), 3143-3157.
18. Casanovas, B.; Font-Bardía, M.; Speed, S.; El Fallah, M. S.; Vicente, R., Field-Induced SMM and Visible/NIR-Luminescence Behaviour of Dinuclear Ln<sup>III</sup> Complexes with 2-Fluorobenzoate. *Eur. J. Inorg. Chem.* **2018**, *2018* (18), 1928-1937.
  19. Casanovas, B.; Speed, S.; Maury, O.; El Fallah, M. S.; Font-Bardía, M.; Vicente, R., Dinuclear Ln<sup>III</sup> Complexes with 9-Anthracenecarboxylate Showing Field-Induced SMM and Visible/NIR Luminescence. *Eur. J. Inorg. Chem.* **2018**, *2018* (34), 3859-3867.
  20. Casanovas, B.; Speed, S.; Maury, O.; Font-Bardía, M.; Vicente, R., Homodinuclear lanthanide 9-anthracenecarboxylate complexes: Field induced SMM and NIR-luminescence. *Polyhedron* **2019**, *169*, 187-194.
  21. Vicente, R.; Tubau, À.; Speed, S.; Mautner, F. A.; Bierbaumer, F.; Fischer, R. C.; Massoud, S. S., Slow magnetic relaxation and luminescence properties in neodymium(III)-4,4,4-trifluoro-1-(2-naphthyl)butane-1,3-dionato complexes incorporating bipyridyl ligands. *New J. Chem.* **2021**, *45* (32), 14713-14723.
  22. Kumar, K.; Abe, D.; Komori-Orisaku, K.; Stefańczyk, O.; Nakabayashi, K.; Shakirova, J. R.; Tunik, S. P.; Ohkoshi, S.-i., Neodymium β-diketonate showing slow magnetic relaxation and acting as a ratiometric thermometer based on near-infrared emission. *RSC Adv.* **2019**, *9* (41), 23444-23449.
  23. Chorazy, S.; Charytanowicz, T.; Wang, J.; Ohkoshi, S.-i.; Sieklucka, B., Hybrid organic-inorganic connectivity of Nd<sup>III</sup>(pyrazine-N,N'-dioxide)[Co<sup>III</sup>(CN)<sub>6</sub>]<sup>3-</sup> coordination chains for creating near-infrared emissive Nd(III) showing field-induced slow magnetic relaxation. *Dalton Trans.* **2018**, *47* (24), 7870-7874.
  24. Jankowski, R.; Zakrzewski, J. J.; Zychowicz, M.; Wang, J.; Oki, Y.; Ohkoshi, S.-i.; Chorazy, S.; Sieklucka, B., SHG-active NIR-emissive molecular nanomagnets generated in layered neodymium(III)-octacyanidometallate(IV) frameworks. *J. Mater. Chem. C* **2021**, *9* (33), 10705-10717.
  25. Chen, H.; Sun, L.; Zheng, K.; Zhang, J.; Ma, P.; Wang, J.; Niu, J., Oxalate-bridging Nd<sup>III</sup>-based arsenotungstate with multifunctional NIR-luminescence and magnetic properties. *Dalton Trans.* **2022**, *51* (26), 10257-10265.
  26. Reddmann, H.; Apostolidis, C.; Walter, O.; Amberger, H.-D., Zur Elektronenstruktur hochsymmetrischer Verbindungen der f-Elemente. 40. Parametrische Analyse des Kristallfeld-Aufspaltungsmusters von Tris(hydrotris(1-pyrazolyl)borato)neodymium(III). *Z. Anorg. Allg. Chem.* **2006**, *632* (8-9), 1405-1408.
  27. Pham, Y. H.; Trush, V. A.; Korabik, M.; Amirkhanov, V. M.; Gawryszewska, P., Nd<sup>3+</sup> and Yb<sup>3+</sup> complexes with N-(diphenylphosphoryl)pyrazine-2-carboxamide as UV-NIR radiation converters and single-ion magnets. *Dyes Pigment.* **2021**, *186*, 108986.
  28. Oyarzabal, I.; Artetxe, B.; Rodríguez-Diéguez, A.; García, J. Á.; Seco, J. M.; Colacio, E., A family of acetato-diphenoxo triply bridged dimetallic Zn<sup>II</sup>Ln<sup>III</sup> complexes: SMM behavior and luminescent properties. *Dalton Trans.* **2016**, *45* (23), 9712-9726.
  29. Casanovas, B.; Speed, S.; Vicente, R.; Font-Bardía, M., Sensitization of visible and NIR emitting lanthanide(III) ions in a series of dinuclear complexes of formula [Ln<sub>2</sub>(μ-2-FBz)<sub>2</sub>(2-FBz)<sub>4</sub>(terpy)<sub>2</sub>]·2(2-HFBz)·2(H<sub>2</sub>O). *Polyhedron* **2019**, *173*, 114113.
  30. Huang, G.; Calvez, G.; Suffren, Y.; Daiguebonne, C.; Freslon, S.; Guillou, O.; Bernot, K., Closing the Circle of the Lanthanide-Murexide Series: Single-Molecule Magnet Behavior and Near-Infrared Emission of the Nd<sup>III</sup> Derivative. *Magnetochemistry* **2018**, *4* (4), 44.
  31. Chang, N. C., Energy Levels and Crystal-Field Splittings of Nd<sup>3+</sup> in Yttrium Oxide. *J. Chem. Phys.* **1966**, *44* (10), 4044-4050.
  32. Gruber, J. B.; Leavitt, R. P.; Morrison, C. A., Absorption spectra, energy levels, and crystal-field analysis of trivalent neodymium in the γ phase of neodymium sesquisulfide (γ-Nd<sub>2</sub>S<sub>3</sub>). *J. Chem. Phys.* **1983**, *79* (4), 1664-1668.

33. Koningstein, J. A.; Geusic, J. E., Energy Levels and Crystal-Field Calculations of Neodymium in Yttrium Aluminum Garnet. *Phys. Rev.* **1964**, *136* (3A), A711-A716.
34. Gruber, J. B.; Hills, M. E.; Allik, T. H.; Jayasankar, C. K.; Quagliano, J. R.; Richardson, F. S., Comparative analysis of Nd<sup>3+</sup> (4f<sup>3</sup>) energy levels in four garnet hosts. *Phys. Rev. B* **1990**, *41* (12), 7999-8012.
35. Crosswhite, H. M.; Crosswhite, H.; Kaseta, F. W.; Sarup, R., The spectrum of Nd<sup>3+</sup>:LaCl<sub>3</sub> *J. Chem. Phys.* **1976**, *64* (5), 1981-1985.
36. Hammond, R. M.; Reid, M. F.; Richardson, F. S., Comparison of crystal field parameters for Ln(C<sub>2</sub>H<sub>5</sub>SO<sub>4</sub>)<sub>3</sub>·9H<sub>2</sub>O and Na<sub>3</sub>(Ln(C<sub>4</sub>H<sub>4</sub>O<sub>5</sub>)<sub>3</sub>)·2NaClO<sub>4</sub>·6H<sub>2</sub>O systems. *J. Less-Common Met.* **1989**, *148* (1), 311-319.
37. Carnall, W. T.; Crosswhite, H.; Crosswhite, H. M. *Energy level structure and transition probabilities in the spectra of the trivalent lanthanides in LaF<sub>3</sub>*; United States, 1978; p DOI: 10.2172/6417825.
38. Thole, B. T.; Carra, P.; Sette, F.; van der Laan, G., X-ray circular dichroism as a probe of orbital magnetization. *Phys. Rev. Lett.* **1992**, *68* (12), 1943-1946.
39. Carra, P.; Thole, B. T.; Altarelli, M.; Wang, X., X-ray circular dichroism and local magnetic fields. *Phys. Rev. Lett.* **1993**, *70* (5), 694-697.
40. Teramura, Y.; Tanaka, A.; Thole, B. T.; Jo, T., Effect of Coulomb Interaction on the X-Ray Magnetic Circular Dichroism Spin Sum Rule in Rare Earths. *J. Phys. Soc. Jpn.* **1996**, *65* (9), 3056-3059.
